# Supplementary material for: Biocatalytic Synthesis of Coumarin S-Glycosides: Towards Non-Cytotoxic Probes for Biomedical Imaging and Sensing
Source: MDPI journal article supplement (doi:10.3390/molecules29061322), 2024-03-16
Supplement: s1 [file s1]

# Biocatalytic Synthesis of Coumarin S-Glycosides: Towards Non-Cytotoxic Probes for Biomedical Imaging and Sensing

Nastassja Burrini<sup>1</sup>, Arnaud Pâris<sup>1</sup>, Guillaume Collet<sup>2</sup>, Pierre Lafite<sup>1,\*</sup> and Richard Daniellou<sup>2,3,\*</sup>

<sup>1</sup> Institut de Chimie Organique et Analytique, University of Orléans CNRS UMR7311, F-45067 Orléans, France; nastassja.burrini@univ-orleans.fr (N.B.)

<sup>2</sup> Chaire de Cosmétologie, AgroParisTech, 10 rue Léonard de Vinci, F-45100 Orléans, France

<sup>3</sup> Université Paris-Saclay, INRAE, AgroParisTech, Micalis Institute, F-78350 Jouy-en-Josas, France

\* Correspondence: pierre.lafite@univ-orleans.fr (P.L.); richard.daniellou@agroparitech.fr (R.D.)

## SUPPLEMENTAL INFORMATION

**Figures S1 to S18:** HPLC/UV chromatograms of substrates, reaction mixture, and purified **S-1** to **S-6** products

**Figures S19 to S24 :** HRMS spectra of purified **S-1** to **S-6**

**Figures S25 to S27:** <sup>1</sup>H and <sup>13</sup>C NMR of undescribed compounds **S-2**, **S-5** and **S-6**.

**Figures S28 to S43 :** Absorption spectra and emission and Excitation fluorescence spectra of compounds **4-MUB**, **7-MC** and products **S-1** to **S-6**

**Figure S44:** LOD and LOQ determination for compound **S-3**

## HPLC Analysis of reactions and purified products

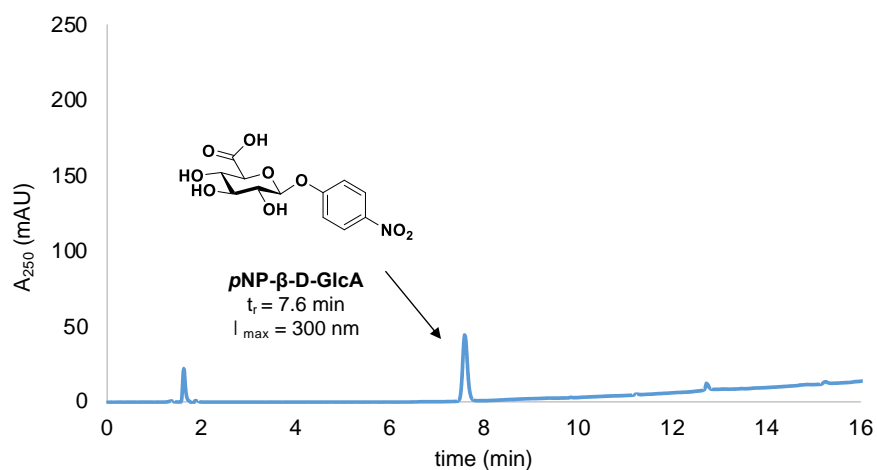

Figure S1. HPLC/UV (250 nm) chromatogram of sugar donor **pNP-β-D-GlcA**

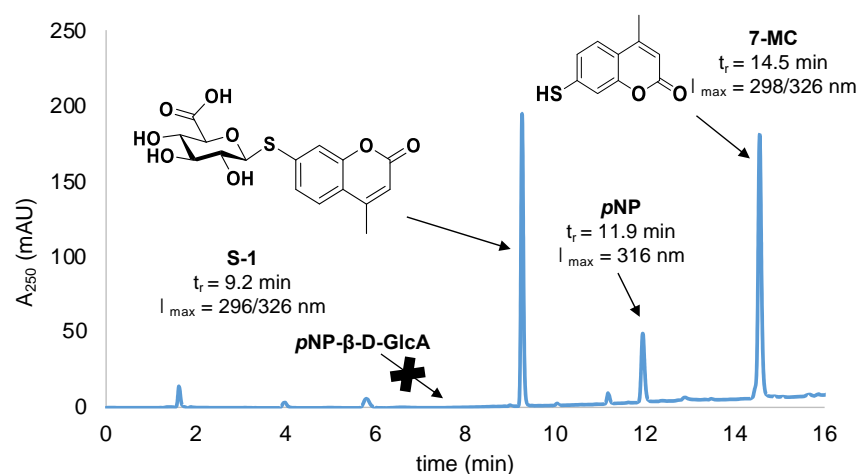

Figure S2. HPLC/UV (250 nm) chromatogram of thioglycoligation reaction for the synthesis of **S1** (24h, 37°C, donor:acceptor = 1:2.5)

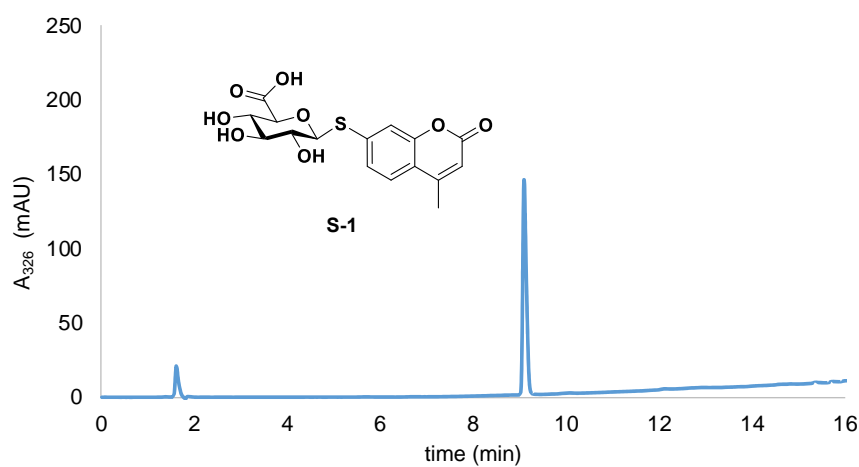

Figure S3. HPLC/UV (326 nm) chromatogram of purified S-glycoside **S-1**

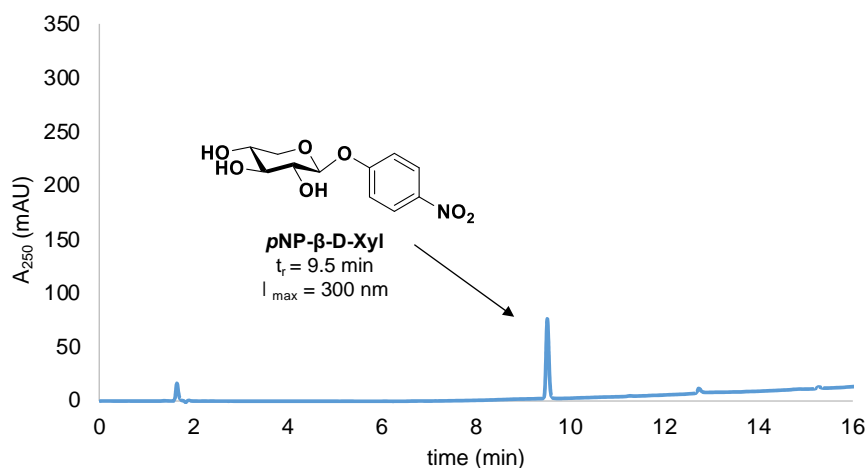

Figure S4. HPLC/UV (250 nm) chromatogram of sugar donor substrate **pNP-β-D-Xyl**

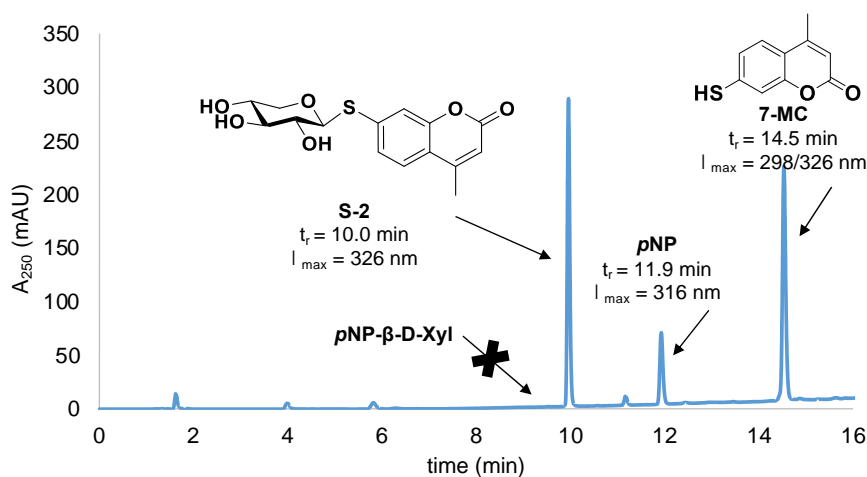

Figure S5. HPLC/UV (250 nm) chromatogram of thioglycoligation reaction for the synthesis of **S-2** (donor:acceptor = 1:2.5)

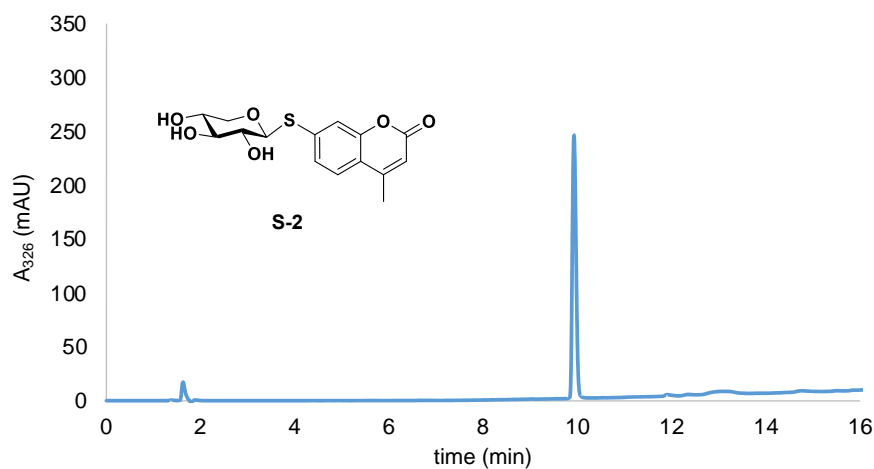

Figure S6. HPLC/UV (326 nm) chromatogram of purified S-glycoside **S-2**

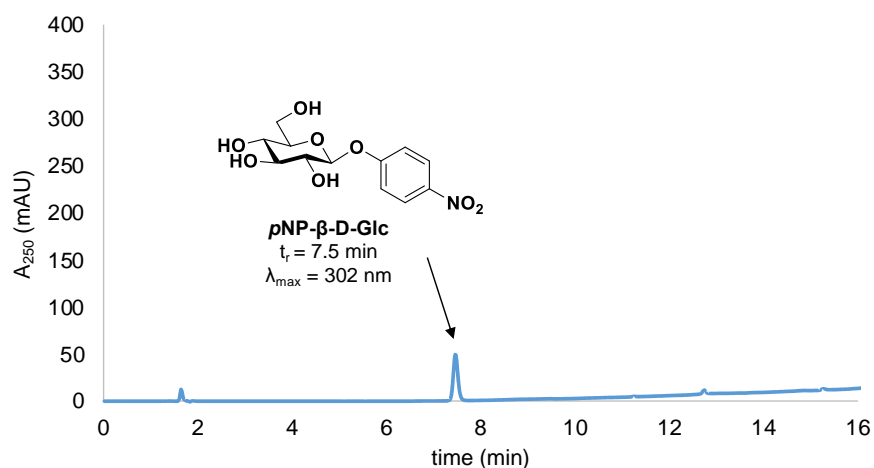

Figure S7. HPLC/UV (250 nm) chromatogram of sugar donor substrate *pNP*- $\beta$ -D-Glc

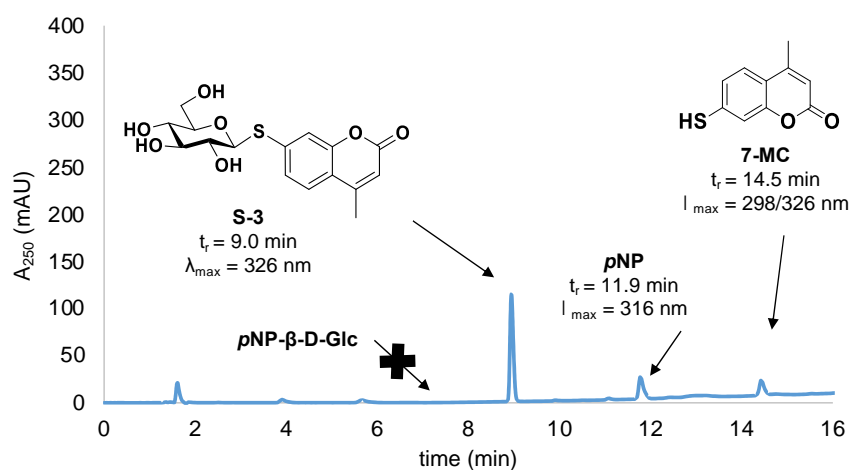

Figure S8. HPLC/UV (250 nm) chromatogram of thioglycosylation reaction for the synthesis of **S-3** (24h, 37°C, donor:acceptor = 1:2.5)

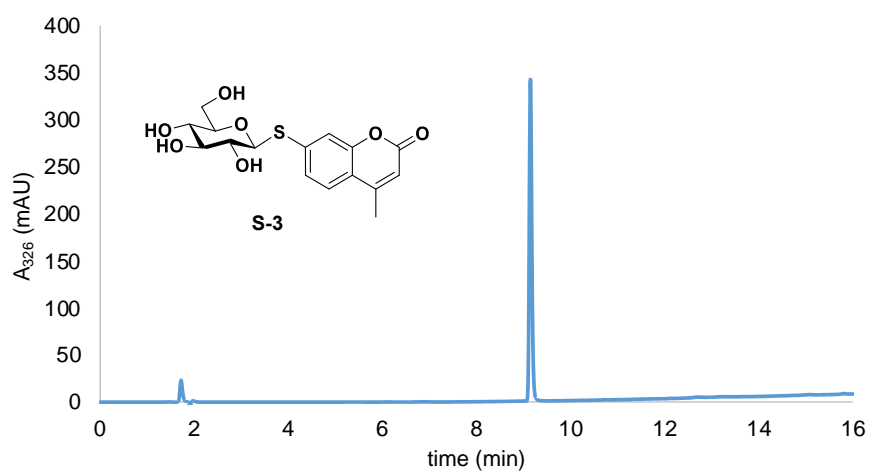

Figure S9. HPLC/UV (326 nm) chromatogram of purified S-glycoside **S-3**

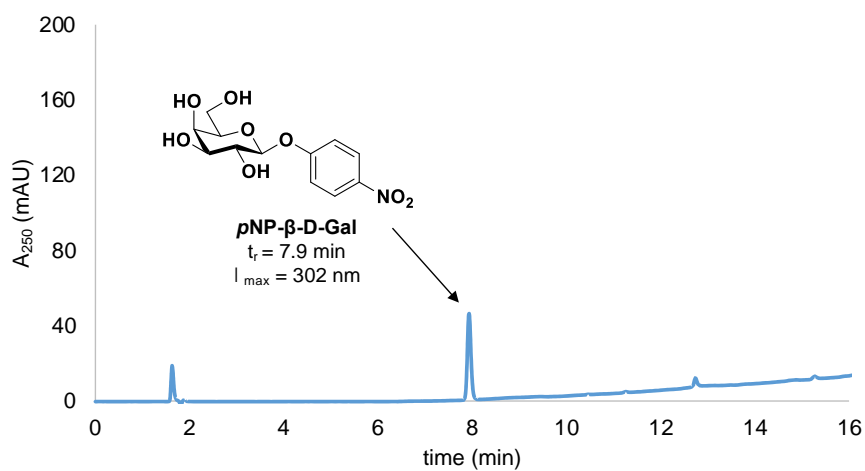

Figure S10. HPLC/UV (250 nm) chromatogram of sugar donor substrate **pNP-β-D-Gal**

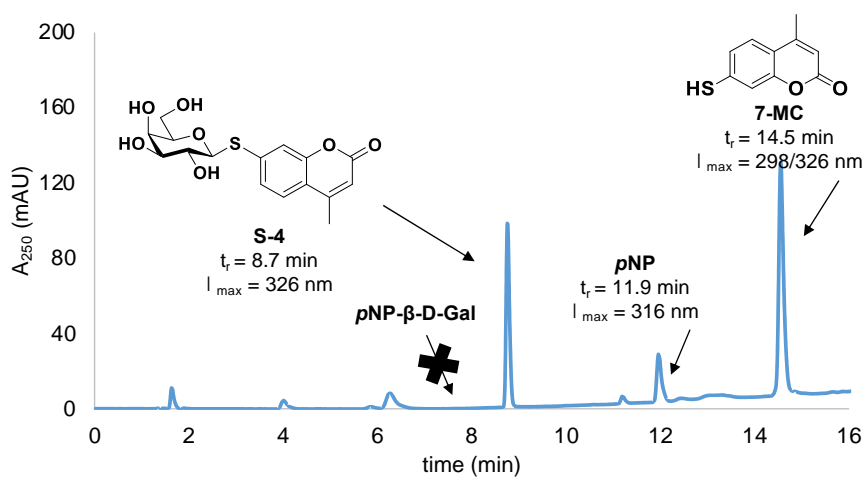

Figure S11. HPLC/UV (250 nm) chromatogram of thioglycosylation reaction for the synthesis of **S-4** (donor:acceptor = 1:2.5)

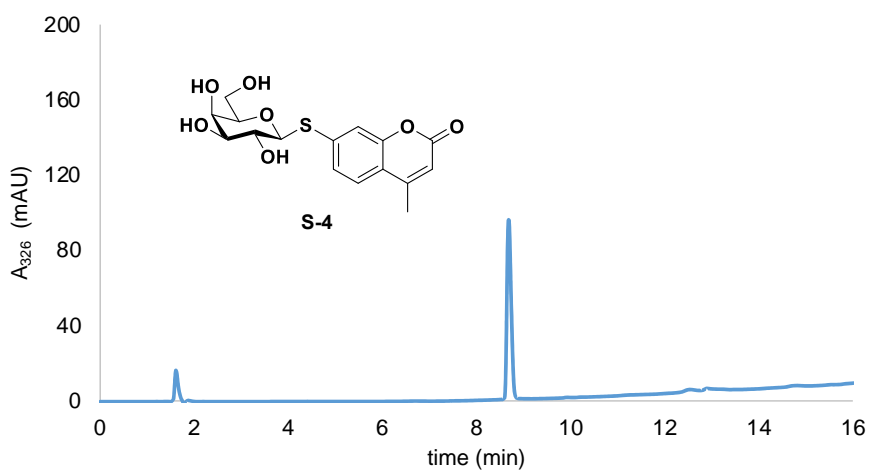

Figure S12. HPLC/UV (326 nm) chromatogram of purified S-glycoside **S-4**

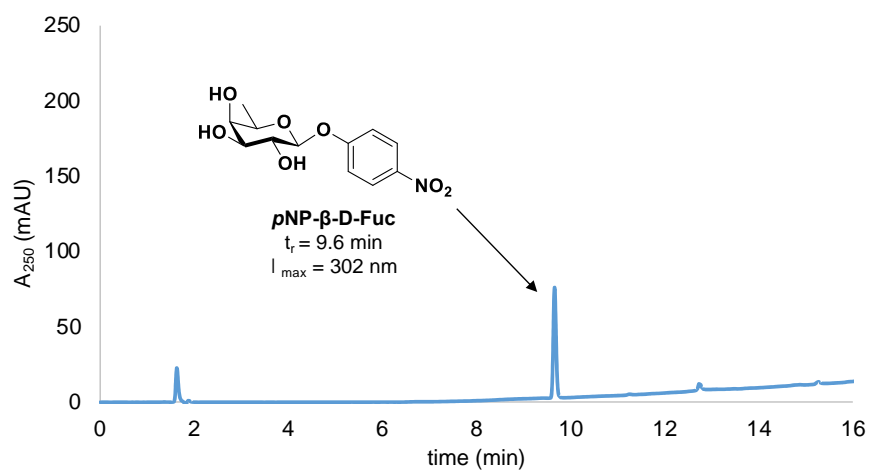

Figure S13. HPLC/UV (250 nm) chromatogram of sugar donor substrate **pNP-β-D-Fuc**

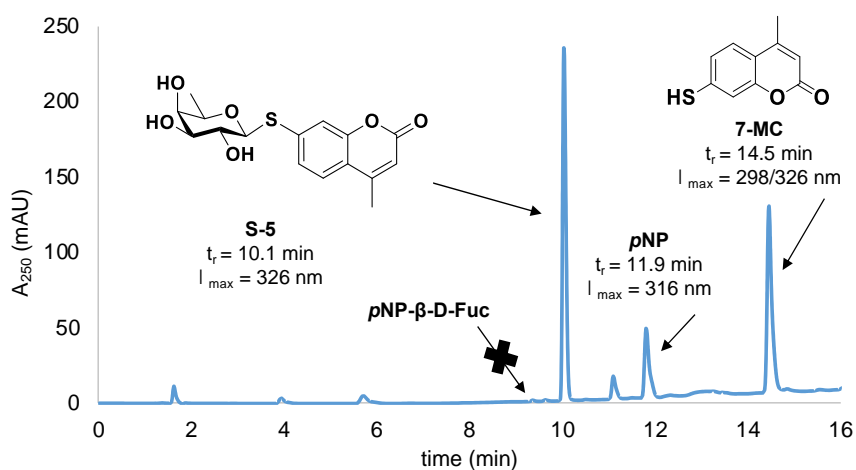

Figure S14. HPLC/UV (250 nm) chromatogram of thioglycoligation reaction for the synthesis of **S-5** (donor:acceptor = 1:2.5)

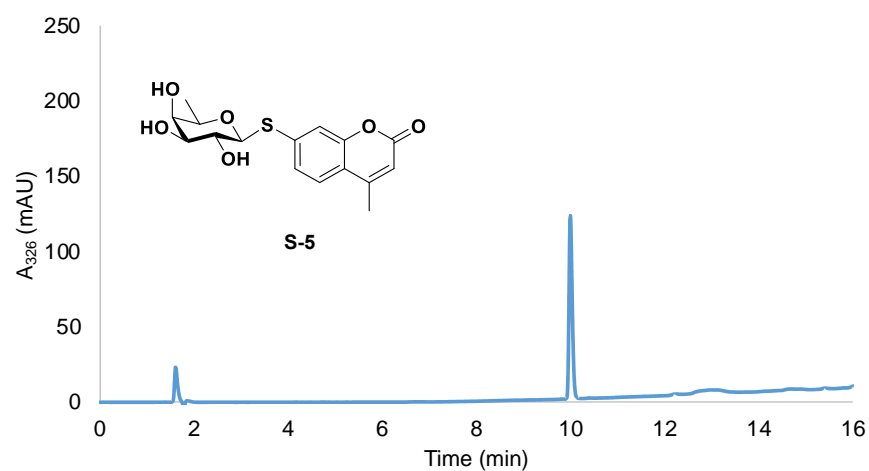

Figure S15. HPLC/UV (326 nm) chromatogram of purified S-glycoside **S-5**

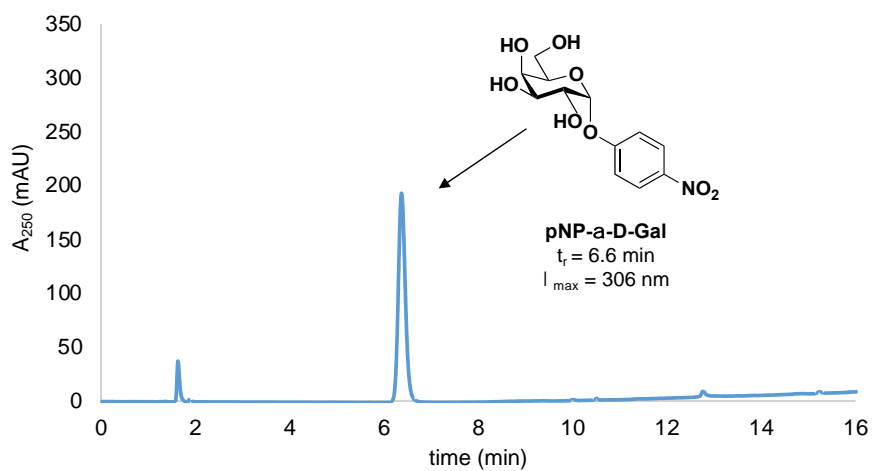

Figure S16. HPLC/UV (250 nm) chromatogram of sugar donor substrate *pNP-α-D-Gal*

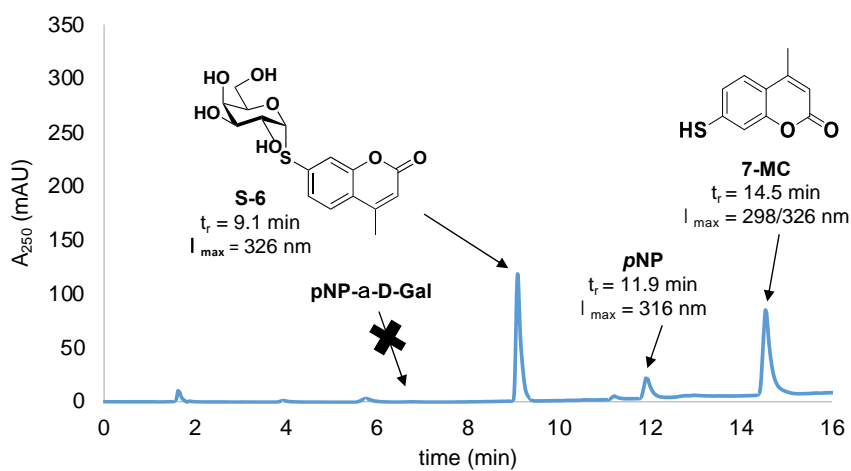

Figure S17. HPLC/UV (250 nm) chromatogram of thioglycoligation reaction for the synthesis of **S-6**  
(donor:acceptor = 1:2.5)

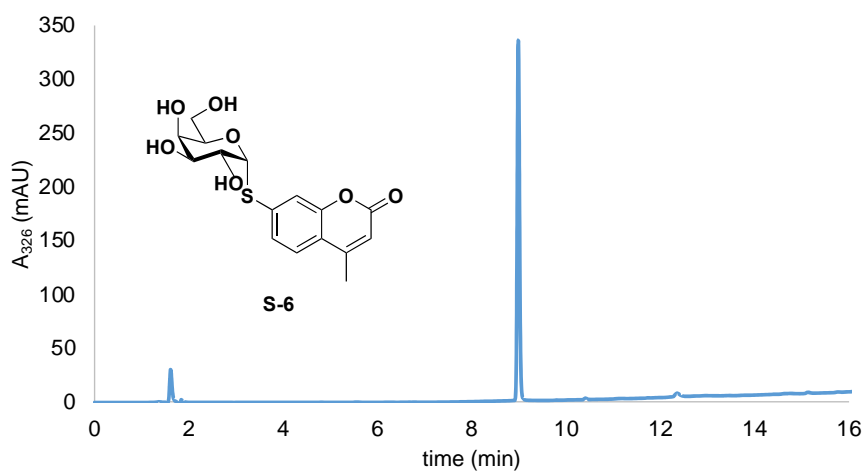

Figure S18. HPLC/UV (326 nm) chromatogram of purified **S-6**

## HRMS Analysis of purified products

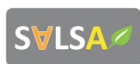

Synthèse et Analyse pour La Santé, l'Agronomie btdn-être  
Spectrométrie de Masse Haute Résolution

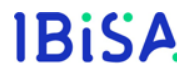

Infrastructures  
en Biologie  
Santé et  
Agronomie

### Analysis Info

Sample Name **GlcA-Coumarin**

Acquisition Date

01/03/2023 11:22:55

Instrument / Ser#

maXis 255552.00086

Analysis Name X071598CYC.d

Method

positif-6.m

### Acquisition Parameter

|             |          |                       |            |                |           |
|-------------|----------|-----------------------|------------|----------------|-----------|
| Source Type | ESI      | Ion Polarity          | Positive   | Set Nebulizer  | 0.6 Bar   |
| Scan Begin  | 50 m/z   | Set Capillary         | 4500 V     | Set Dry Heater | 200 °C    |
| Scan End    | 2500 m/z | Set Collision Cell RF | 1800.0 Vpp | Set Dry Gas    | 7.0 l/min |

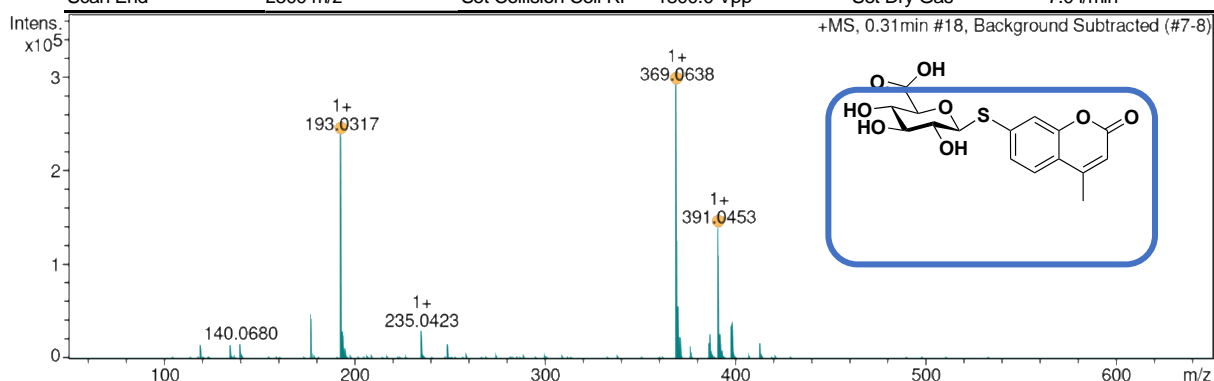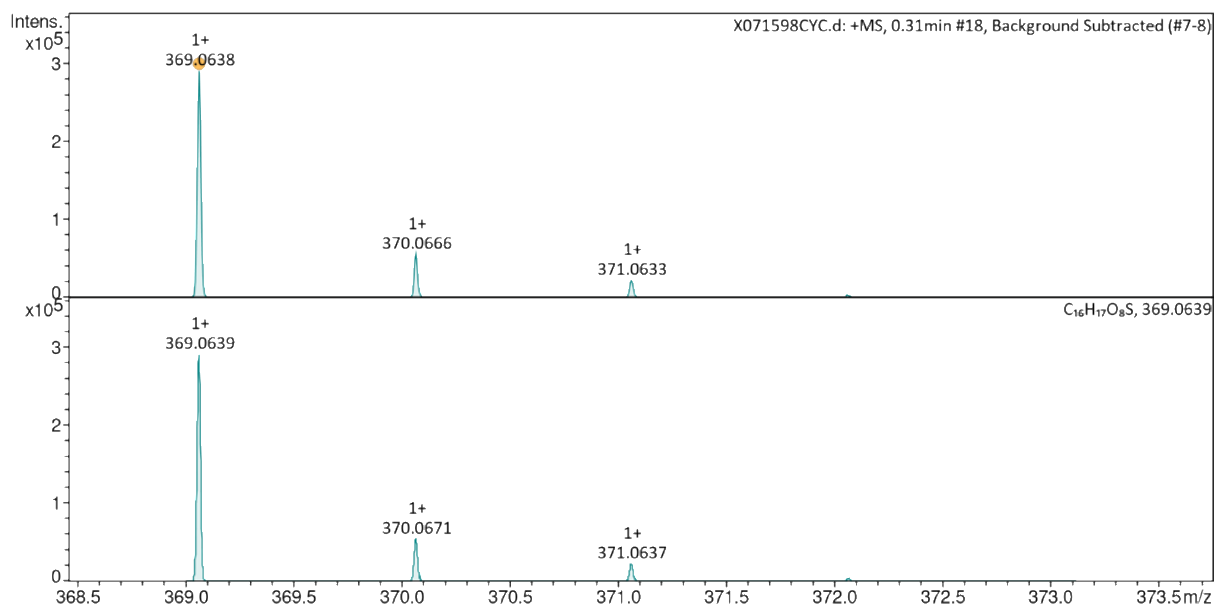

| Meas. m/z  | z  | # | Ion Formula | m/z        | err [ppm] | mSigma | rdb | e <sup>-</sup> Conf |
|------------|----|---|-------------|------------|-----------|--------|-----|---------------------|
| 193.031669 | 1+ | 1 | C10H9O2S    | 193.031777 | 0.6       | 4.1    | 7.0 | even                |
| 369.063796 | 1+ | 1 | C16H17O8S   | 369.063865 | 0.2       | 2.0    | 9.0 | even                |
| 391.045312 | 1+ | 1 | C16H16NaO8S | 391.045809 | 1.3       | 6.3    | 9.0 | even                |



## Analysis Info

Sample Name GlcA-Coumarin

Acquisition Date

01/03/2023 22:18:57

Instrument / Ser#

maXis 255552.00086

Analysis Name X071599CYC.d

Method

Negatif.m

## Acquisition Parameter

|             |          |                       |           |                |           |
|-------------|----------|-----------------------|-----------|----------------|-----------|
| Source Type | ESI      | Ion Polarity          | Negative  | Set Nebulizer  | 0.6 Bar   |
| Scan Begin  | 50 m/z   | Set Capillary         | 4000 V    | Set Dry Heater | 200 °C    |
| Scan End    | 3000 m/z | Set Collision Cell RF | 500.0 Vpp | Set Dry Gas    | 7.0 l/min |

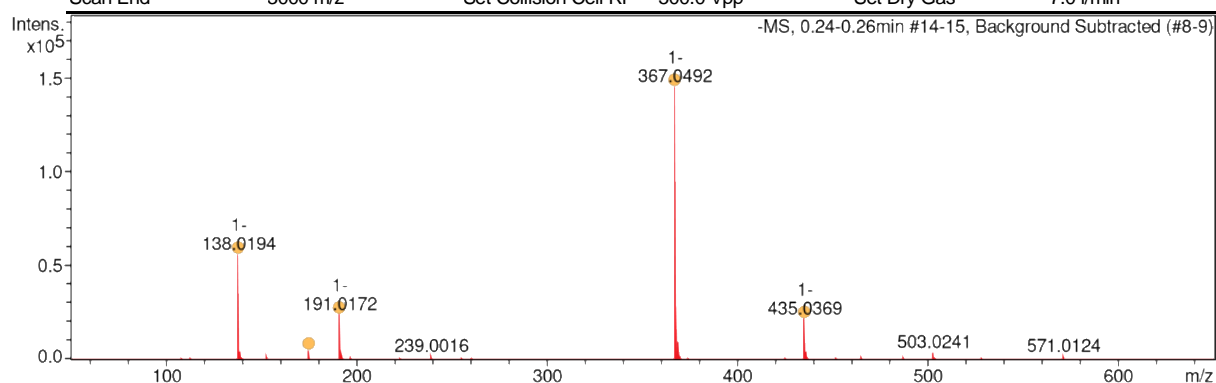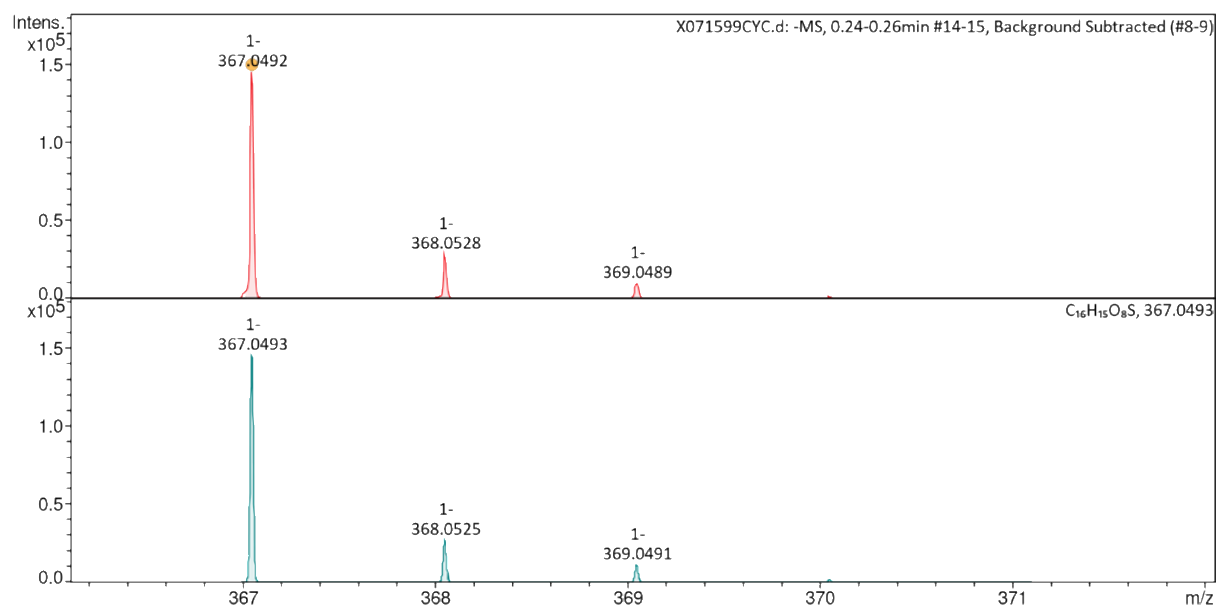

| Meas. m/z  | # | Ion Formula  | m/z        | err [ppm] | mSigma | rdb | e <sup>-</sup> Conf | N-<br>Rule |
|------------|---|--------------|------------|-----------|--------|-----|---------------------|------------|
| 138.019357 | 1 | C6H4NO3      | 138.019667 | 2.2       | 3.8    | 5.0 | even                | ok         |
| 175.025353 | 1 | C6H7O6       | 175.024812 | -3.1      | n.a.   | 3.0 | even                | ok         |
| 191.017155 | 1 | C10H7O2S     | 191.017224 | 0.4       | 7.3    | 7.0 | even                | ok         |
| 367.049228 | 1 | C16H15O8S    | 367.049312 | 0.2       | 7.6    | 9.0 | even                | ok         |
| 435.036878 | 1 | C17H16NaO10S | 435.036736 | -0.3      | 11.1   | 9.0 | even                | ok         |

Figure S19: MS spectra (positive and negative mode) of product **S-1**

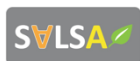

Analysis Info

Sample Name Xyl-Coumarin

Acquisition Date 01/03/2023 11:21:23  
Instrument / Ser# maXis 255552.00086

Analysis Name X071596CYC.d

Method positif-6.m

Acquisition Parameter

|             |          |                       |            |                |           |
|-------------|----------|-----------------------|------------|----------------|-----------|
| Source Type | ESI      | Ion Polarity          | Positive   | Set Nebulizer  | 0.6 Bar   |
| Scan Begin  | 50 m/z   | Set Capillary         | 4500 V     | Set Dry Heater | 200 °C    |
| Scan End    | 2500 m/z | Set Collision Cell RF | 1800.0 Vpp | Set Dry Gas    | 7.0 l/min |

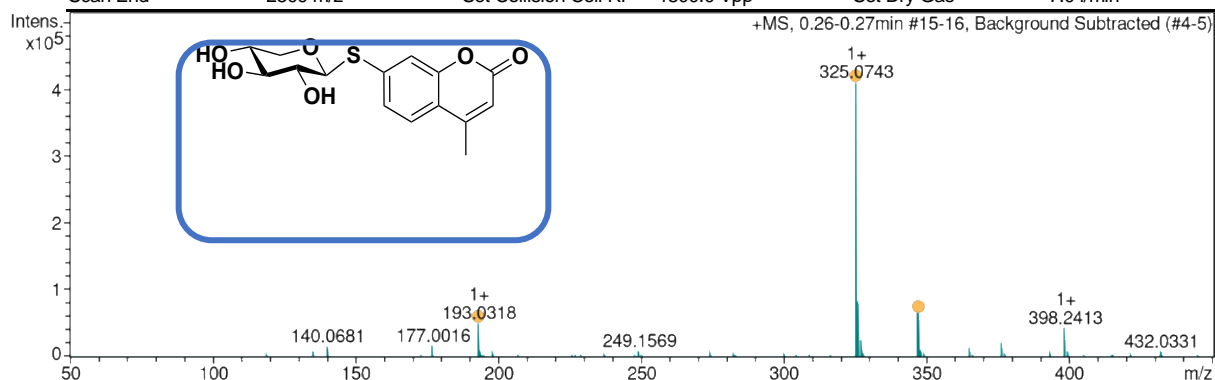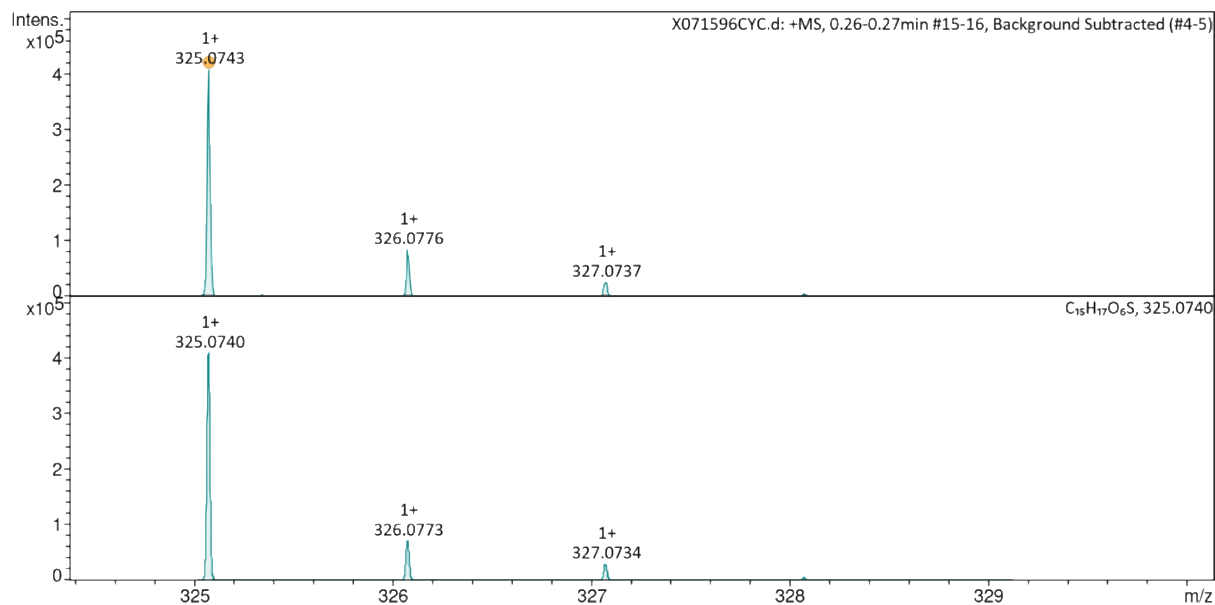

| Meas. m/z  | z  | # | Ion Formula | m/z        | err [ppm] | mSigma | rdB | e <sup>-</sup> Conf |
|------------|----|---|-------------|------------|-----------|--------|-----|---------------------|
| 193.031796 | 1+ | 1 | C10H9O2S    | 193.031777 | -0.1      | 6.8    | 7.0 | even                |
| 325.074328 | 1+ | 1 | C15H17O6S   | 325.074036 | -0.9      | 15.8   | 8.0 | even                |
| 347.055977 | 1+ | 1 | C15H16NaO6S | 347.055980 | 0.0       | 6.4    | 8.0 | even                |

Analysis Info

Sample Name Xyl-Coumarin

Acquisition Date 01/03/2023 22:17:29  
Instrument / Ser# maXis 255552.00086

Analysis Name X071597CYC.d

Method Negatif.m

Acquisition Parameter

|             |          |                       |           |                |           |
|-------------|----------|-----------------------|-----------|----------------|-----------|
| Source Type | ESI      | Ion Polarity          | Negative  | Set Nebulizer  | 0.6 Bar   |
| Scan Begin  | 50 m/z   | Set Capillary         | 4000 V    | Set Dry Heater | 200 °C    |
| Scan End    | 3000 m/z | Set Collision Cell RF | 500.0 Vpp | Set Dry Gas    | 7.0 l/min |

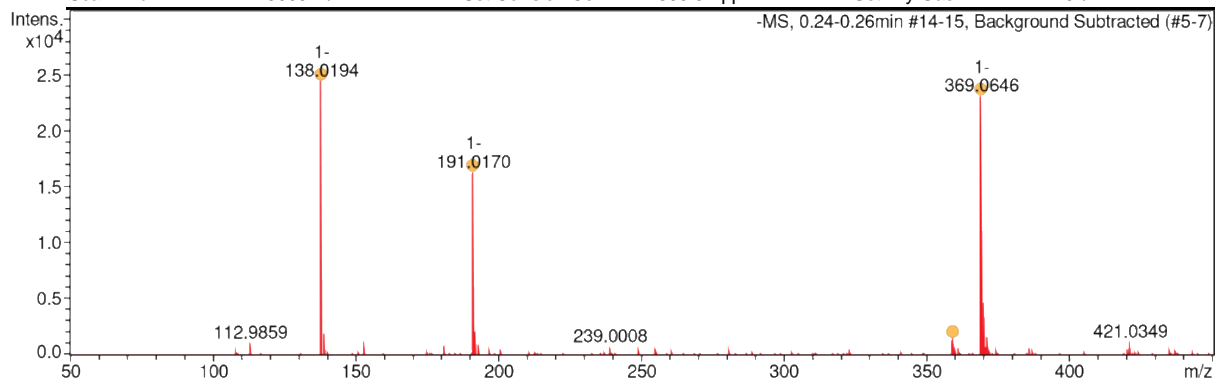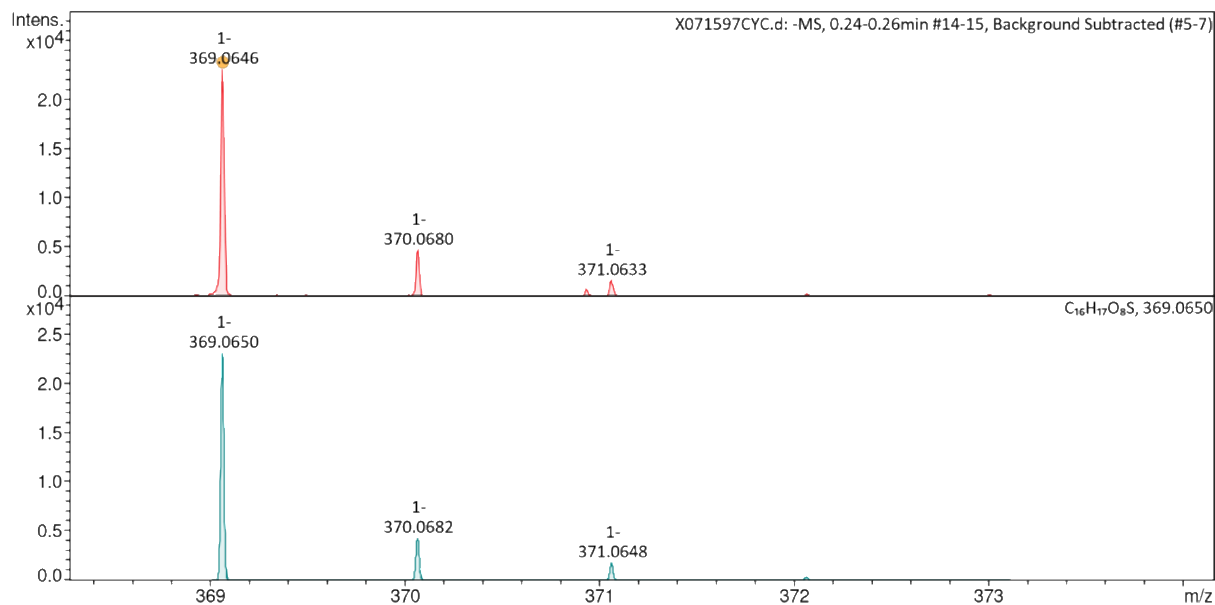

| Meas. m/z  | # | Ion Formula | m/z        | err [ppm] | mSigma | rdB  | e <sup>-</sup> Conf | N-<br>Rule |
|------------|---|-------------|------------|-----------|--------|------|---------------------|------------|
| 138.019403 | 1 | C6H4NO3     | 138.019667 | 1.9       | 6.9    | 5.0  | even                | ok         |
| 191.016976 | 1 | C10H7O2S    | 191.017224 | 1.3       | 6.6    | 7.0  | even                | ok         |
| 359.034861 | 1 | C16H11N2O6S | 359.034331 | -1.5      | 213.1  | 12.0 | even                | ok         |
| 369.064579 | 1 | C16H17O8S   | 369.064962 | 1.0       | 11.3   | 8.0  | even                | ok         |

Figure S20: MS spectra (positive and negative mode) of product **S-2**

Analysis Info

Sample Name Glc-Coumarin

Acquisition Date

08/03/2023 11:37:47

Instrument / Ser#

maXis 255552.00086

Analysis Name X071636CYC.d

Method

positif-6.m

Acquisition Parameter

|             |          |                       |            |                |           |
|-------------|----------|-----------------------|------------|----------------|-----------|
| Source Type | ESI      | Ion Polarity          | Positive   | Set Nebulizer  | 0.6 Bar   |
| Scan Begin  | 50 m/z   | Set Capillary         | 4500 V     | Set Dry Heater | 200 °C    |
| Scan End    | 2500 m/z | Set Collision Cell RF | 1800.0 Vpp | Set Dry Gas    | 7.0 l/min |

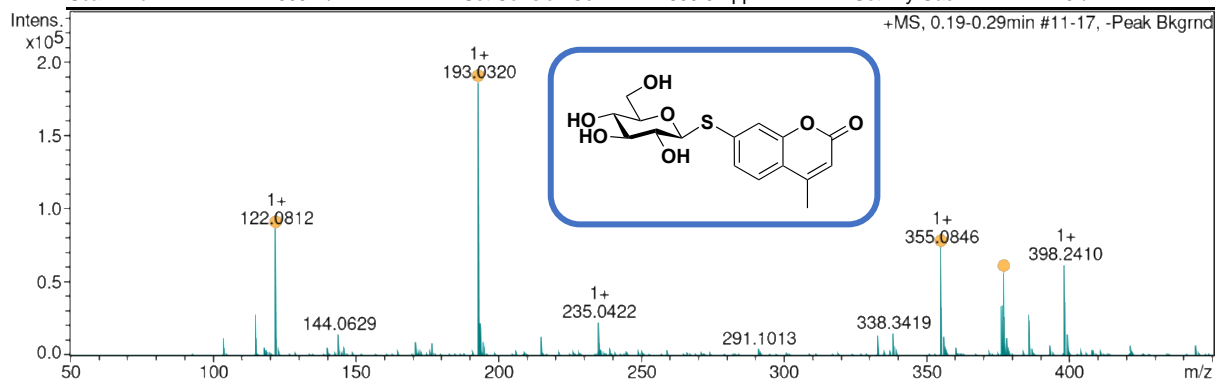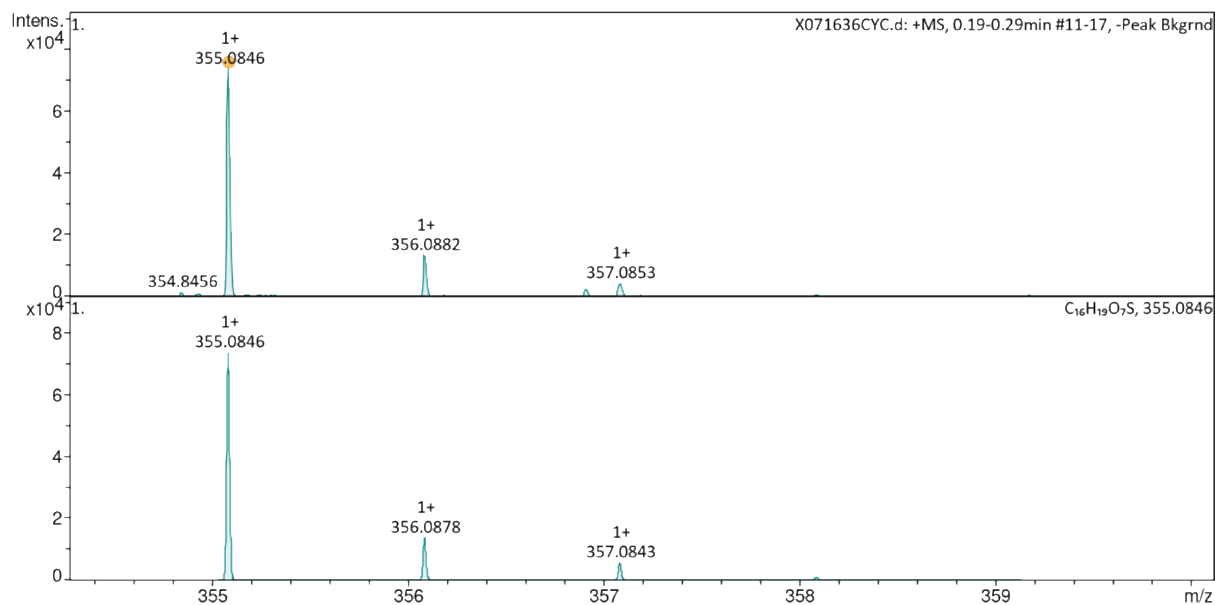

| Meas. m/z  | z  | # | Ion Formula                                        | m/z        | err [ppm] | mSigma | rdb | e <sup>-</sup> Conf |
|------------|----|---|----------------------------------------------------|------------|-----------|--------|-----|---------------------|
| 122.081157 | 1+ | 1 | C <sub>4</sub> H <sub>12</sub> NO <sub>3</sub>     | 122.081170 | 0.1       | 6.4    | 0.0 | even                |
| 193.031977 | 1+ | 1 | C <sub>10</sub> H <sub>9</sub> O <sub>2</sub> S    | 193.031777 | -1.0      | 1.6    | 7.0 | even                |
| 355.084597 | 1+ | 1 | C <sub>16</sub> H <sub>19</sub> O <sub>7</sub> S   | 355.084600 | 0.0       | 10.9   | 8.0 | even                |
| 377.066610 | 1+ | 1 | C <sub>16</sub> H <sub>18</sub> NaO <sub>7</sub> S | 377.066545 | -0.2      | 18.3   | 8.0 | even                |

Analysis Info

Sample Name **Glc-Coumarin**  
Analysis Name X071637CYC\_17867.d

Acquisition Date 08/03/2023 13:52:59  
Instrument / Ser# maXis 255552.00086  
Method Negatif.m

Acquisition Parameter

|             |          |                       |           |                |           |
|-------------|----------|-----------------------|-----------|----------------|-----------|
| Source Type | ESI      | Ion Polarity          | Negative  | Set Nebulizer  | 0.6 Bar   |
| Scan Begin  | 50 m/z   | Set Capillary         | 4000 V    | Set Dry Heater | 200 °C    |
| Scan End    | 3000 m/z | Set Collision Cell RF | 500.0 Vpp | Set Dry Gas    | 7.0 l/min |

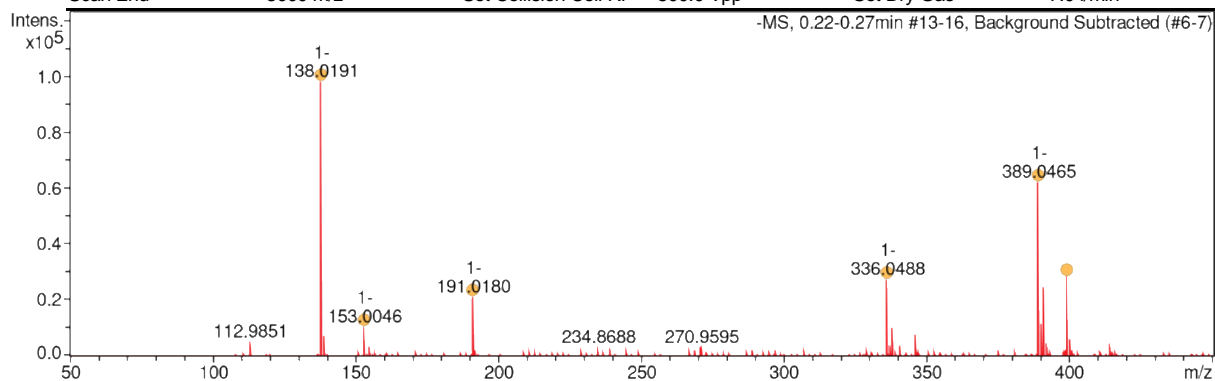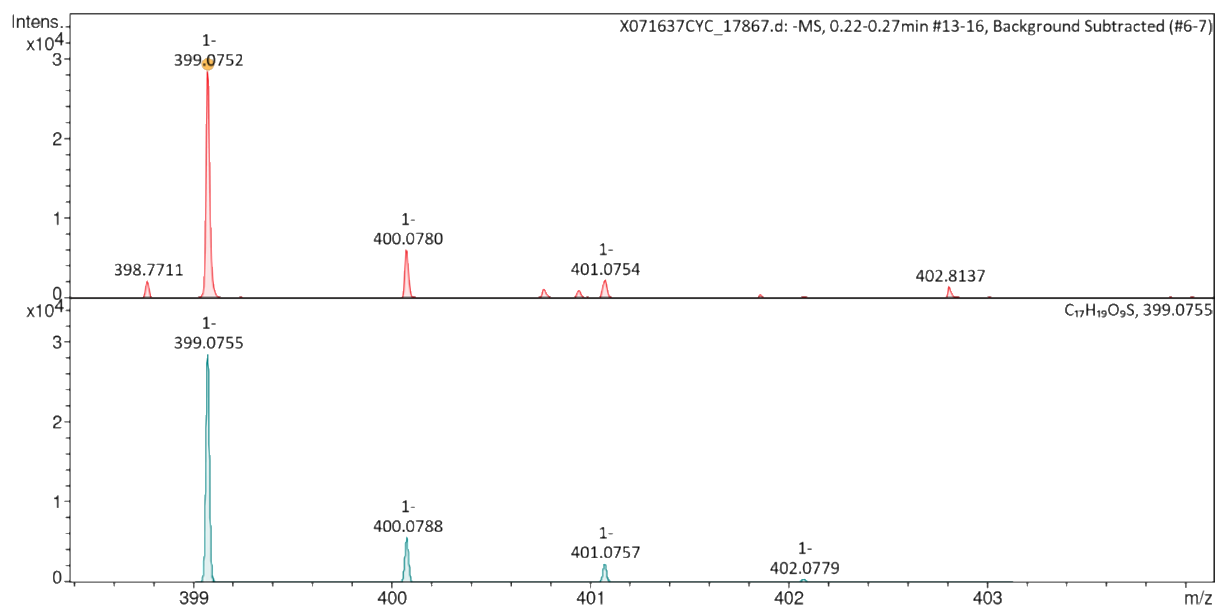

| Meas. m/z  | # | Ion Formula | m/z        | err [ppm] | mSigma | rdb | e <sup>-</sup> | Conf | N-<br>Rule |
|------------|---|-------------|------------|-----------|--------|-----|----------------|------|------------|
| 138.019086 | 1 | C6H4NO3     | 138.019667 | 4.2       | 3.2    | 5.0 | even           |      | ok         |
| 153.004579 | 1 | C3H5O7      | 153.004076 | -3.3      | 48.0   | 1.0 | even           |      | ok         |
| 191.018004 | 1 | C10H7O2S    | 191.017224 | -4.1      | 16.8   | 7.0 | even           |      | ok         |
| 336.048765 | 1 | C12H15ClNO8 | 336.049168 | 1.2       | 9.0    | 5.0 | even           |      | ok         |
| 389.046463 | 1 | C16H18ClO7S | 389.046725 | 0.7       | 2.4    | 7.0 | even           |      | ok         |
| 399.075231 | 1 | C17H19O9S   | 399.075527 | 0.7       | 9.9    | 8.0 | even           |      | ok         |

Figure S21: MS spectra (positive and negative mode) of product **S-3**

## Analysis Info

Sample Name **Gal\_Coumarin**  
Analysis Name X076634CYC.d

Acquisition Date 20/02/2024 17:29:43  
Instrument / Ser# maXis 255552.00086  
Method negatif-dgp-l+sl.m

## Acquisition Parameter

|             |          |                       |           |                |           |
|-------------|----------|-----------------------|-----------|----------------|-----------|
| Source Type | ESI      | Ion Polarity          | Negative  | Set Nebulizer  | 0.6 Bar   |
| Scan Begin  | 50 m/z   | Set Capillary         | 4000 V    | Set Dry Heater | 200 °C    |
| Scan End    | 3000 m/z | Set Collision Cell RF | 500.0 Vpp | Set Dry Gas    | 7.0 l/min |

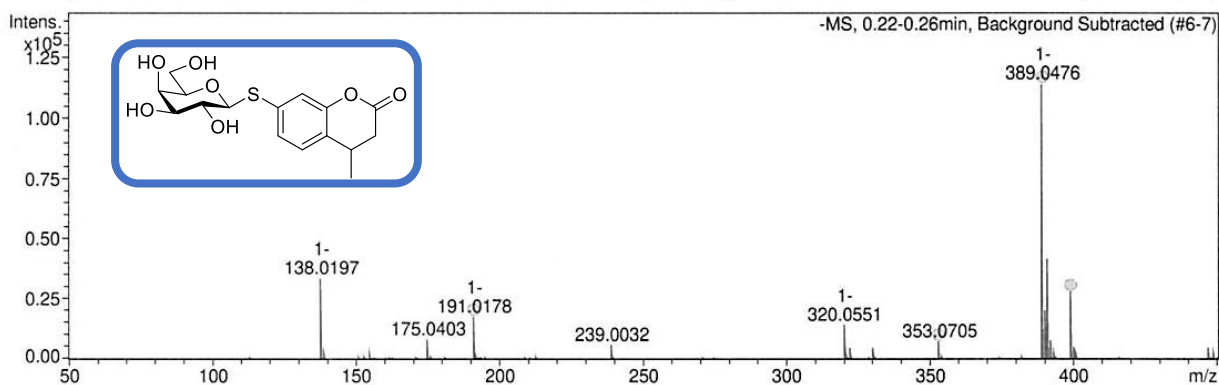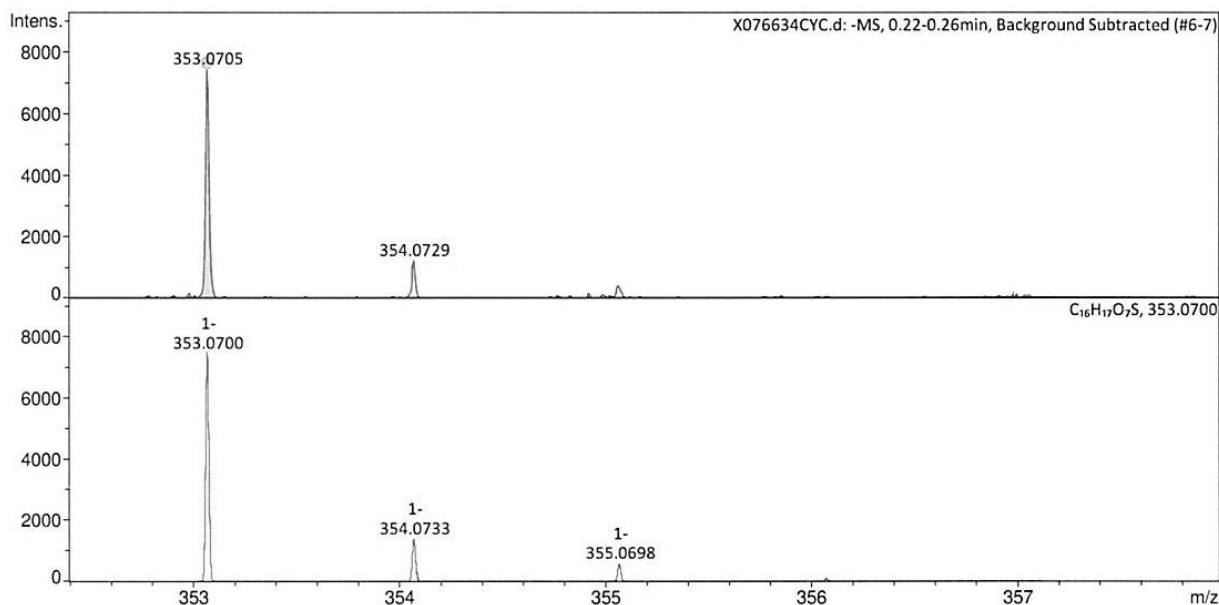

| Meas. m/z  | # | Ion Formula                                        | m/z        | err [ppm] | mSigma | rdb | e <sup>-</sup> | Conf | N-Rule |
|------------|---|----------------------------------------------------|------------|-----------|--------|-----|----------------|------|--------|
| 191.017826 | 1 | C <sub>10</sub> H <sub>7</sub> O <sub>2</sub> S    | 191.017224 | -3.2      | 13.2   | 7.0 | even           |      | ok     |
| 353.070454 | 1 | C <sub>16</sub> H <sub>17</sub> O <sub>7</sub> S   | 353.070047 | -1.2      | 39.6   | 8.0 | even           |      | ok     |
| 389.047626 | 1 | C <sub>16</sub> H <sub>18</sub> ClO <sub>7</sub> S | 389.046725 | -2.3      | 12.5   | 7.0 | even           |      | ok     |
| 399.076168 | 1 | C <sub>17</sub> H <sub>19</sub> O <sub>9</sub> S   | 399.075527 | -1.6      | 12.4   | 8.0 | even           |      | ok     |

Figure S22: MS spectra (negative mode) of product **S-4**

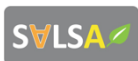

### Analysis Info

Sample Name **Fuc-Coumarin**  
Analysis Name X071634CYC\_17862.d

Acquisition Date 08/03/2023 12:35:25  
Instrument / Ser# maXis 255552.00086  
Method positif-6.m

### Acquisition Parameter

|             |          |                       |            |                |           |
|-------------|----------|-----------------------|------------|----------------|-----------|
| Source Type | ESI      | Ion Polarity          | Positive   | Set Nebulizer  | 0.6 Bar   |
| Scan Begin  | 50 m/z   | Set Capillary         | 4500 V     | Set Dry Heater | 200 °C    |
| Scan End    | 2500 m/z | Set Collision Cell RF | 1800.0 Vpp | Set Dry Gas    | 7.0 l/min |

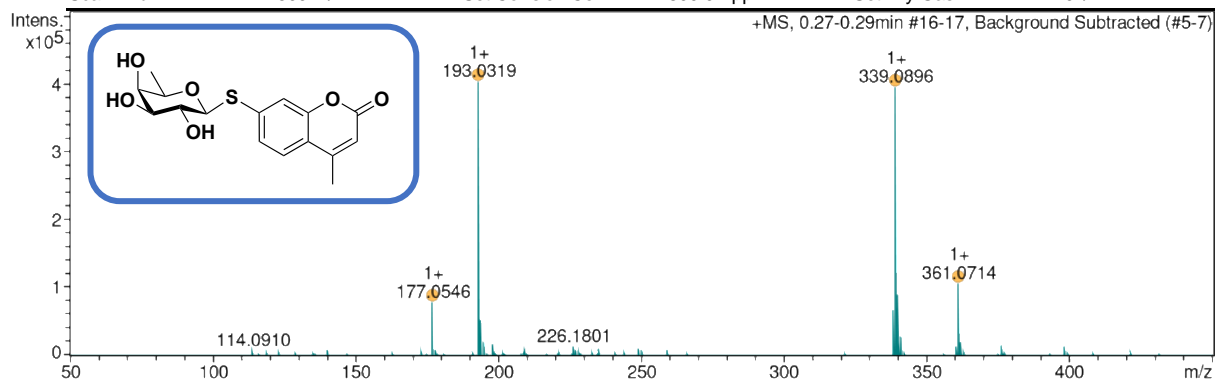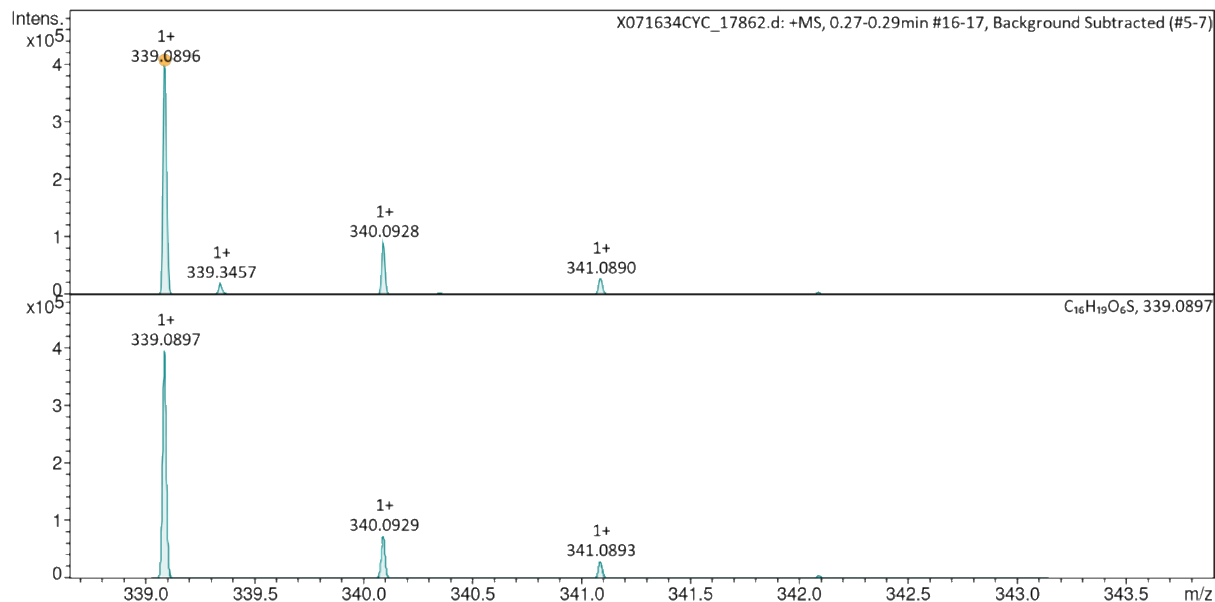

| Meas. m/z  | z  | # | Ion Formula                                        | m/z        | err [ppm] | mSigma | rdB | e <sup>-</sup> Conf |
|------------|----|---|----------------------------------------------------|------------|-----------|--------|-----|---------------------|
| 177.054598 | 1+ | 1 | C <sub>10</sub> H <sub>9</sub> O <sub>3</sub>      | 177.054621 | 0.1       | 3.7    | 7.0 | even                |
| 193.031913 | 1+ | 1 | C <sub>10</sub> H <sub>9</sub> O <sub>2</sub> S    | 193.031777 | -0.7      | 7.5    | 7.0 | even                |
| 339.089599 | 1+ | 1 | C <sub>16</sub> H <sub>19</sub> O <sub>6</sub> S   | 339.089686 | 0.3       | 21.5   | 8.0 | even                |
| 361.071356 | 1+ | 1 | C <sub>16</sub> H <sub>18</sub> NaO <sub>6</sub> S | 361.071630 | 0.8       | 10.2   | 8.0 | even                |

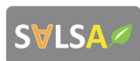

### Analysis Info

Sample Name **Fuc-Coumarin**

Acquisition Date 08/03/2023 13:45:02

Instrument / Ser# maXis 255552.00086

Analysis Name X071635CYC.d

Method Negatif.m

### Acquisition Parameter

|             |          |                       |           |                |           |
|-------------|----------|-----------------------|-----------|----------------|-----------|
| Source Type | ESI      | Ion Polarity          | Negative  | Set Nebulizer  | 0.6 Bar   |
| Scan Begin  | 50 m/z   | Set Capillary         | 4000 V    | Set Dry Heater | 200 °C    |
| Scan End    | 3000 m/z | Set Collision Cell RF | 500.0 Vpp | Set Dry Gas    | 7.0 l/min |

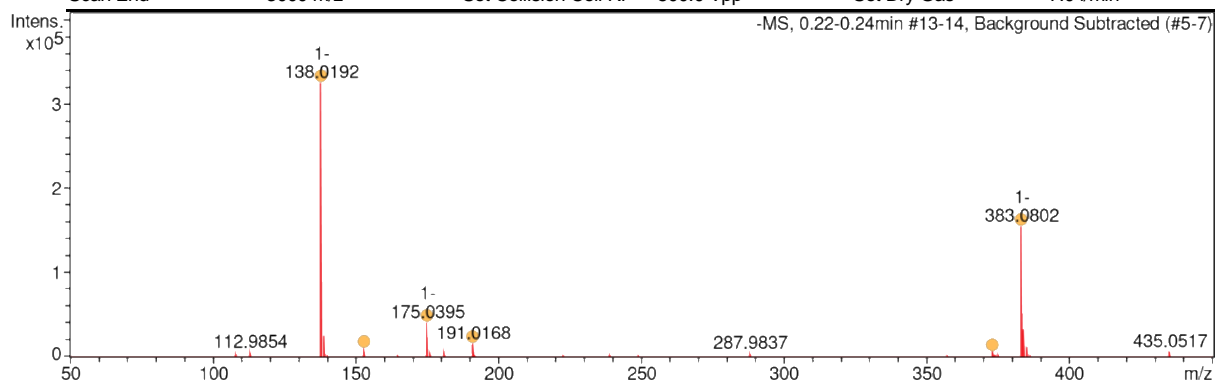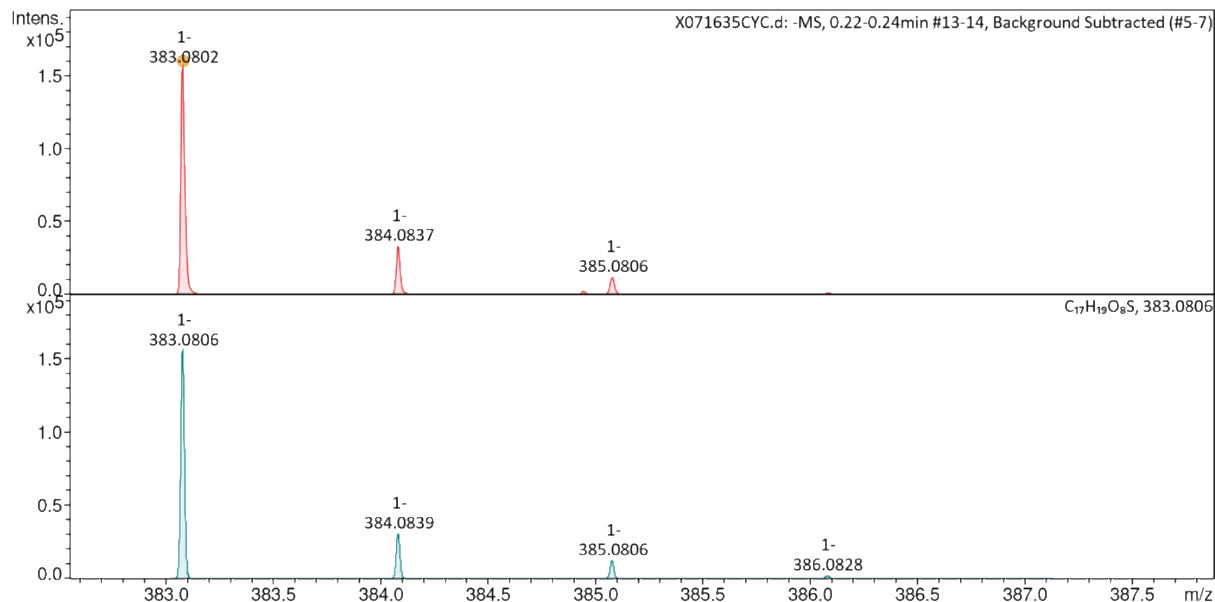

C<sub>17</sub>H<sub>19</sub>O<sub>8</sub>S, 383.0806

| Meas. m/z  | # | Ion Formula | m/z        | err [ppm] | mSigma | rdb | e <sup>-</sup> | Conf | N-Rule |
|------------|---|-------------|------------|-----------|--------|-----|----------------|------|--------|
| 138.019167 | 1 | C6H4NO3     | 138.019667 | 3.6       | 5.2    | 5.0 | even           |      | ok     |
| 153.004429 | 1 | C3H5O7      | 153.004076 | -2.3      | 43.1   | 1.0 | even           |      | ok     |
| 175.039515 | 1 | C10H7O3     | 175.040068 | 3.2       | 6.3    | 7.0 | even           |      | ok     |
| 191.016828 | 1 | C10H7O2S    | 191.017224 | 2.1       | 5.6    | 7.0 | even           |      | ok     |
| 373.052003 | 1 | C16H18ClO6S | 373.051811 | -0.5      | 48.9   | 7.0 | even           |      | ok     |
| 383.080191 | 1 | C17H19O8S   | 383.080612 | 1.1       | 8.3    | 8.0 | even           |      | ok     |



Figure S23: MS spectra (positive and negative mode) of product **S-5**

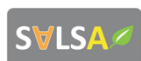

Synthèse et Analyse pour La Santé, l'Agronomie btdn-être  
Spectrométrie de Masse Haute Résolution

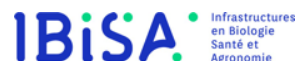

#### Analysis Info

Sample Name **Gal-Coumarin**

Acquisition Date 26/04/2023 13:44:50  
Instrument / Ser# maXis 255552.00086

Analysis Name X072559CYC.d

Method positif-6.m

#### Acquisition Parameter

|             |          |                       |            |                |           |
|-------------|----------|-----------------------|------------|----------------|-----------|
| Source Type | ESI      | Ion Polarity          | Positive   | Set Nebulizer  | 0.6 Bar   |
| Scan Begin  | 50 m/z   | Set Capillary         | 4500 V     | Set Dry Heater | 200 °C    |
| Scan End    | 2500 m/z | Set Collision Cell RF | 1800.0 Vpp | Set Dry Gas    | 7.0 l/min |

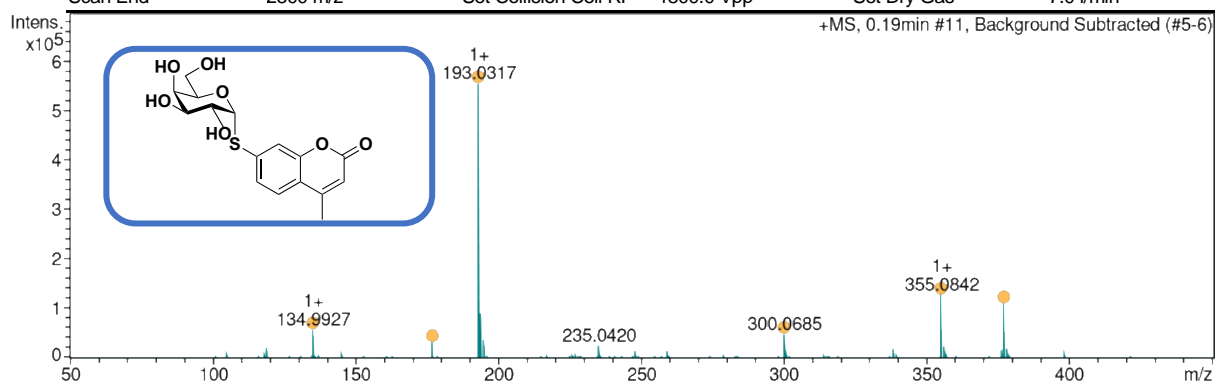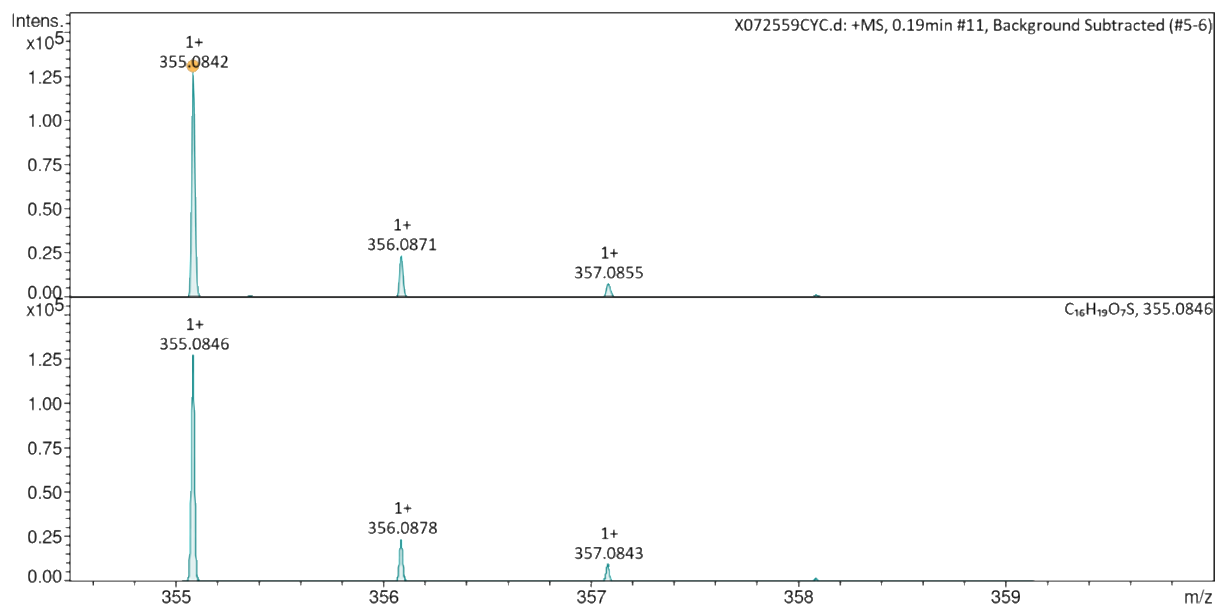

| Meas. m/z  | z  | # | Ion Formula | m/z        | err [ppm] | mSigma | rdb  | e <sup>-</sup> Conf |
|------------|----|---|-------------|------------|-----------|--------|------|---------------------|
| 134.992651 | 1+ | 1 | C3H3O6      | 134.992414 | -1.8      | 57.8   | 3.0  | even                |
| 177.001193 | 1+ | 1 | C9H5O2S     | 177.000477 | -4.0      | 46.8   | 8.0  | even                |
| 193.031719 | 1+ | 1 | C10H9O2S    | 193.031777 | 0.3       | 22.5   | 7.0  | even                |
| 300.068473 | 1+ | 1 | C16H14NO3S  | 300.068891 | 1.4       | 6.4    | 11.0 | even                |
| 355.084229 | 1+ | 1 | C16H19O7S   | 355.084600 | 1.0       | 7.1    | 8.0  | even                |
| 377.066047 | 1+ | 1 | C16H18NaO7S | 377.066545 | 1.3       | 14.5   | 8.0  | even                |

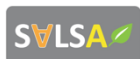

### Analysis Info

Sample Name Gal-Coumarin

Acquisition Date 26/04/2023 19:37:41

Instrument / Ser# maxis 255552.00086

Analysis Name X072560CYC.d

Method Negatif.m

### Acquisition Parameter

|             |          |                       |           |                |           |
|-------------|----------|-----------------------|-----------|----------------|-----------|
| Source Type | ESI      | Ion Polarity          | Negative  | Set Nebulizer  | 0.6 Bar   |
| Scan Begin  | 50 m/z   | Set Capillary         | 4000 V    | Set Dry Heater | 200 °C    |
| Scan End    | 3000 m/z | Set Collision Cell RF | 500.0 Vpp | Set Dry Gas    | 7.0 l/min |

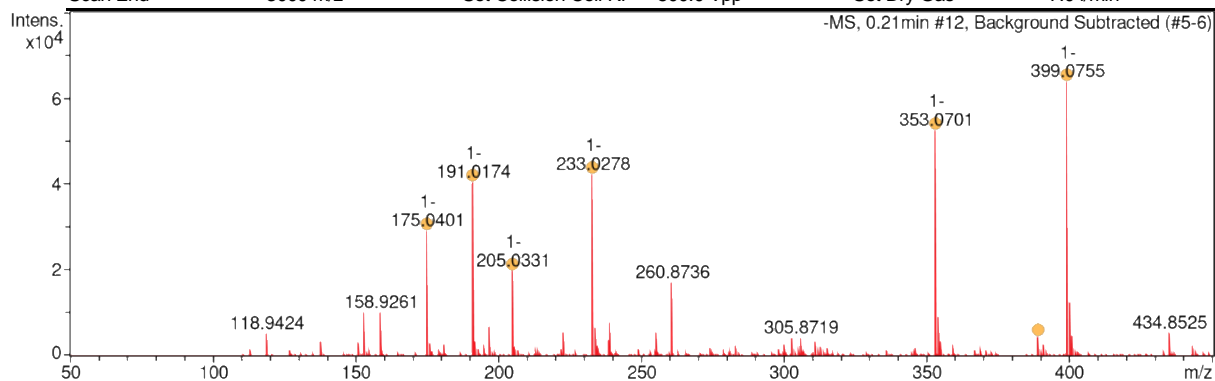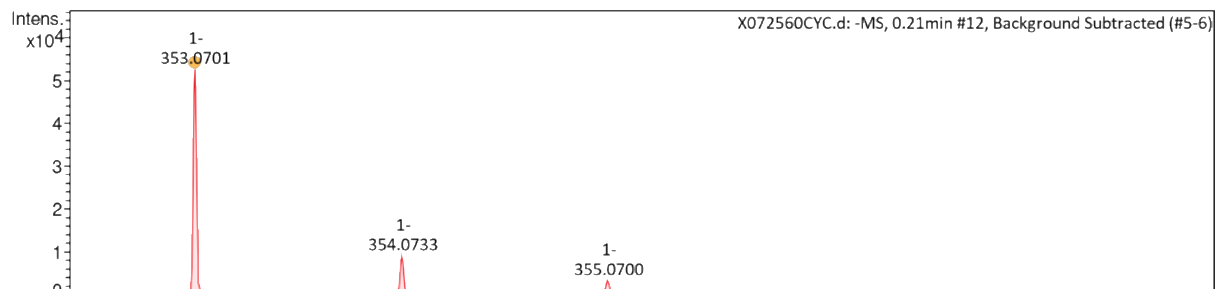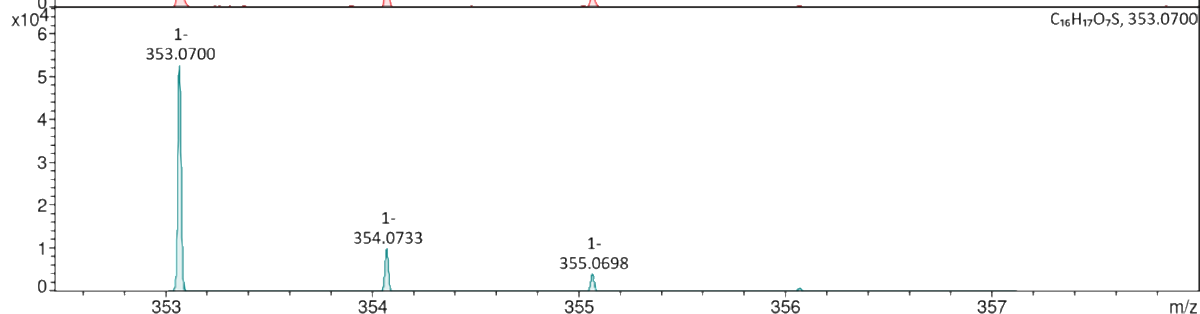

| Meas. m/z  | # | Ion Formula | m/z        | err [ppm] | mSigma | rdb | e <sup>-</sup> Conf | N-<br>Rule |
|------------|---|-------------|------------|-----------|--------|-----|---------------------|------------|
| 175.040089 | 1 | C10H7O3     | 175.040068 | -0.1      | 9.2    | 7.0 | even                | ok         |
| 191.017446 | 1 | C10H7O2S    | 191.017224 | -1.2      | 18.0   | 7.0 | even                | ok         |
| 205.033068 | 1 | C11H9O2S    | 205.032874 | -0.9      | 10.3   | 7.0 | even                | ok         |
| 233.027833 | 1 | C12H9O3S    | 233.027789 | -0.2      | 8.6    | 8.0 | even                | ok         |
| 353.070147 | 1 | C16H17O7S   | 353.070047 | -0.3      | 10.1   | 8.0 | even                | ok         |
| 389.045792 | 1 | C16H18ClO7S | 389.046725 | 2.4       | 129.6  | 7.0 | even                | ok         |
| 399.075520 | 1 | C17H19O9S   | 399.075527 | 0.0       | 7.8    | 8.0 | even                | ok         |

Figure S24: MS spectra (positive and negative mode) of product **S-6**

**$^1\text{H}$  and  $^{13}\text{C}$ -NMR of undescribed products**

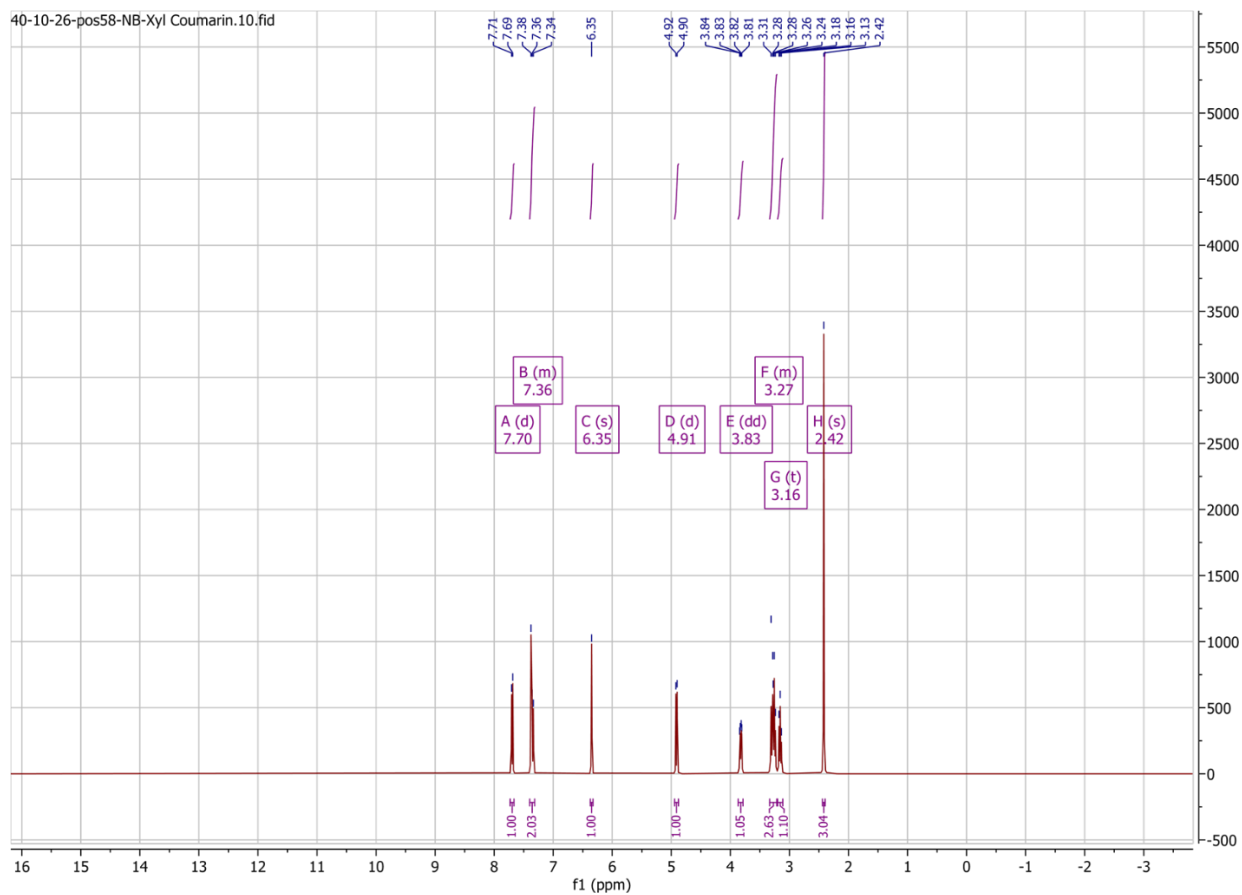

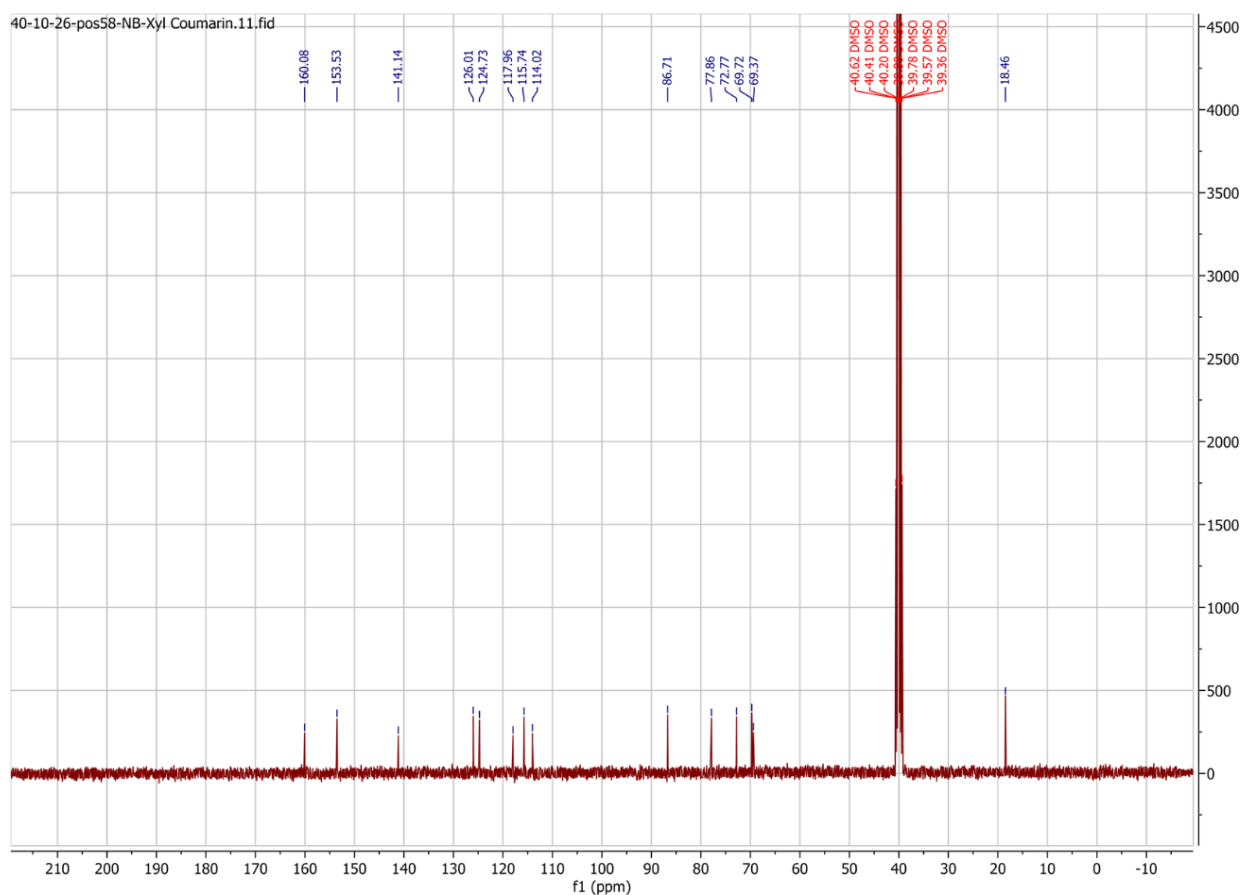

Figure S25.  $^1\text{H}$  and  $^{13}\text{C}$ -NMR of purified product **S-2**

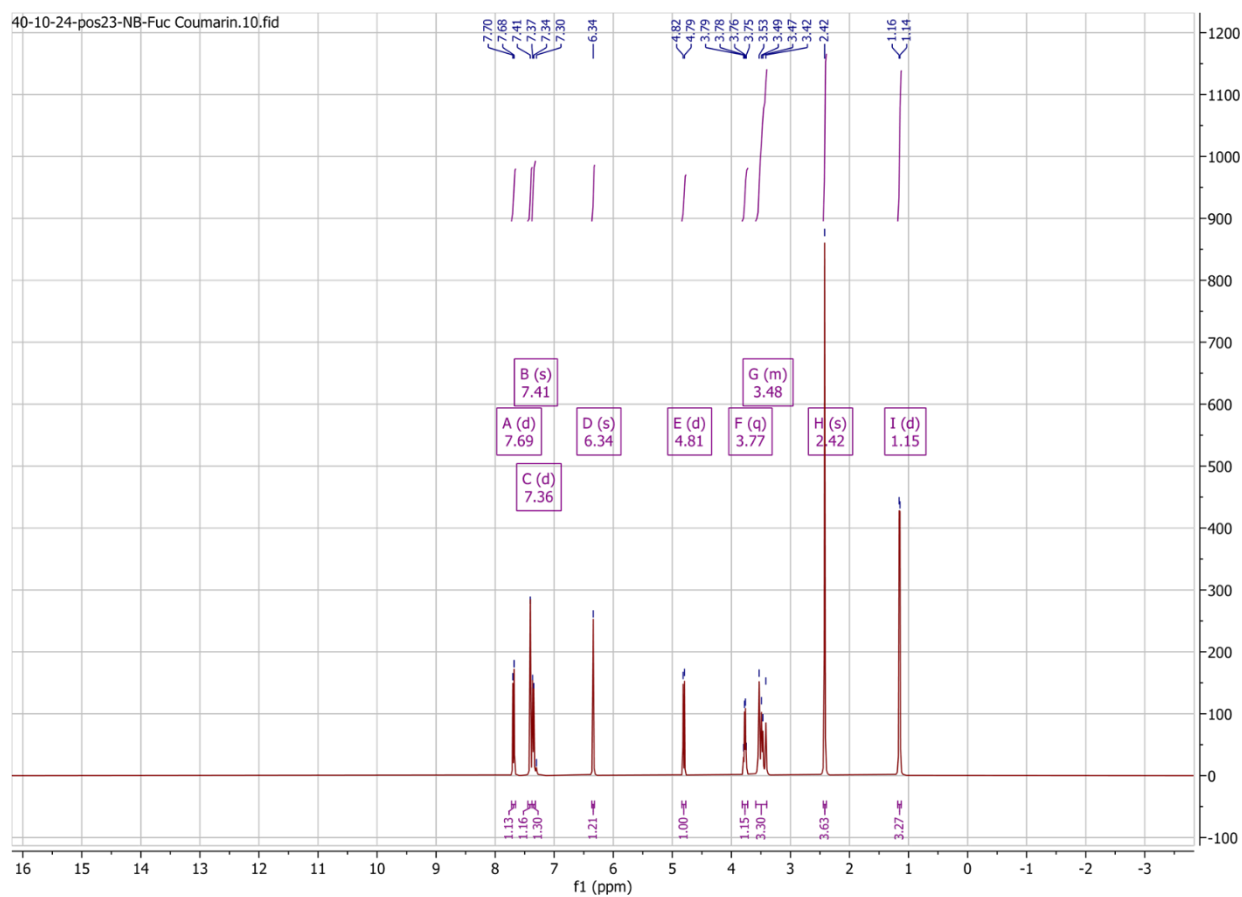

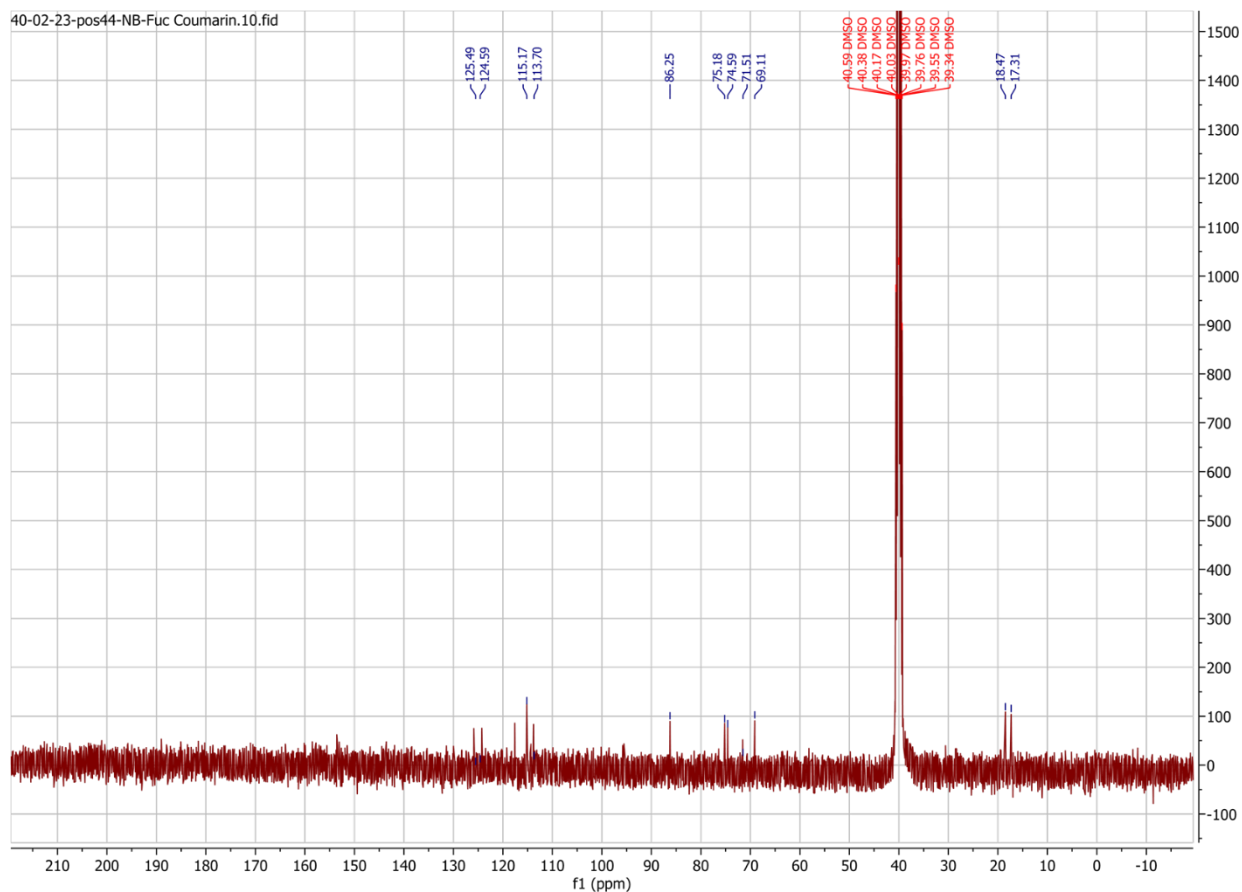

Figure S26.  $^1\text{H}$  and  $^{13}\text{C}$ -NMR of purified product **S-5**

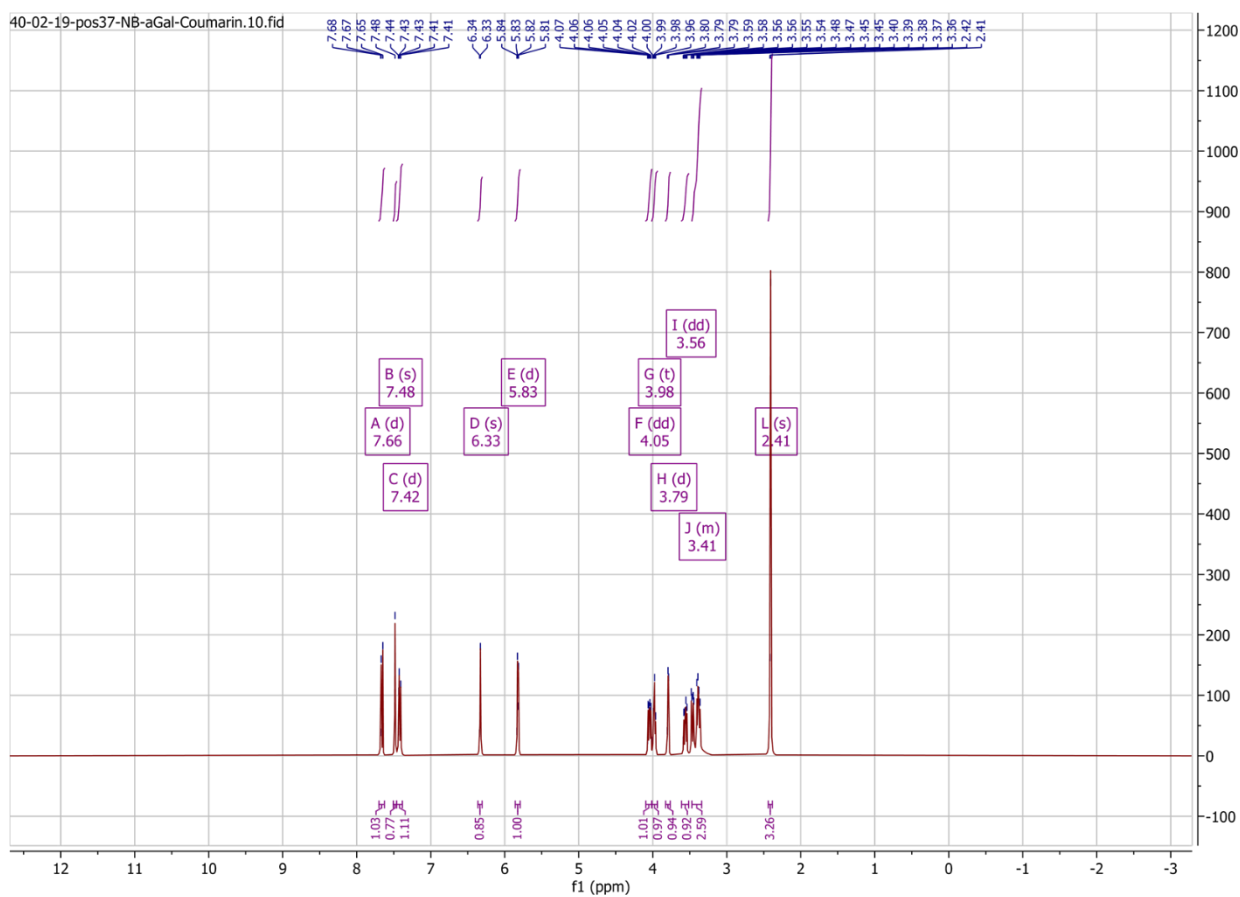

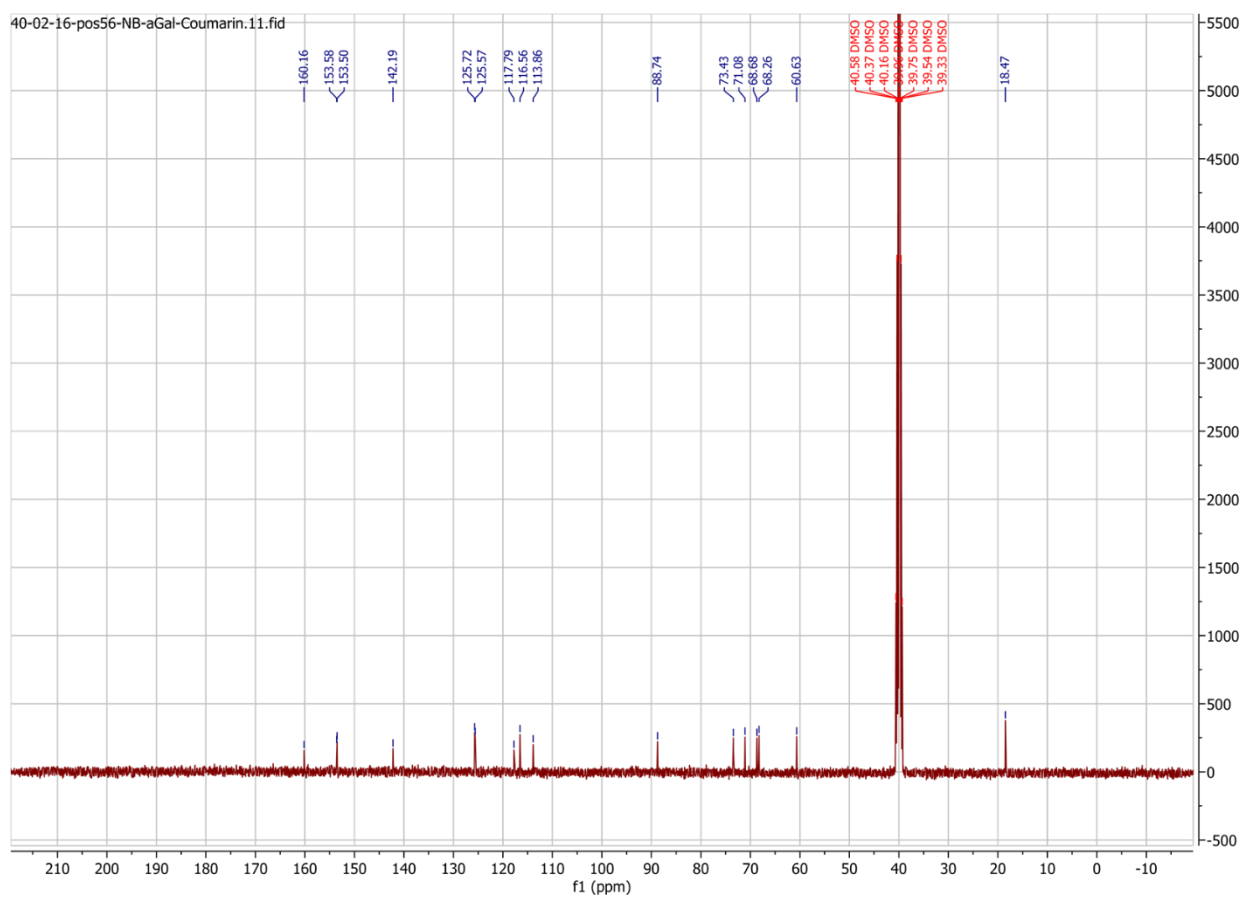

Figure S27.  $^1\text{H}$  and  $^{13}\text{C}$ -NMR of purified product **S-6**

## Fluorescence analysis and spectra

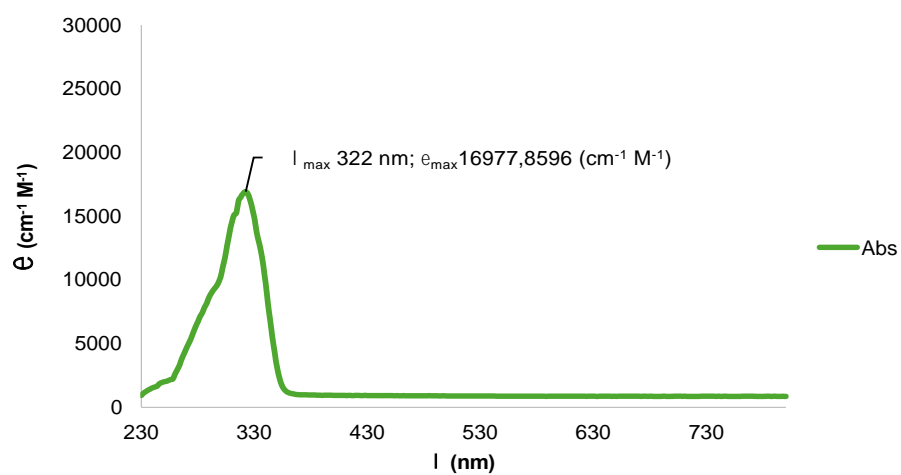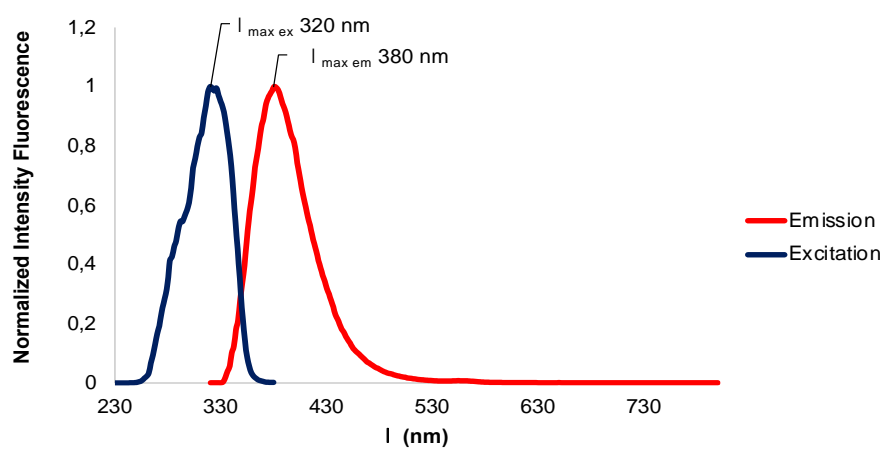

Figure S28. Absorbance and normalized fluorescence emission/excitation spectra of **4-MUB**  
0.1 mM in DMF

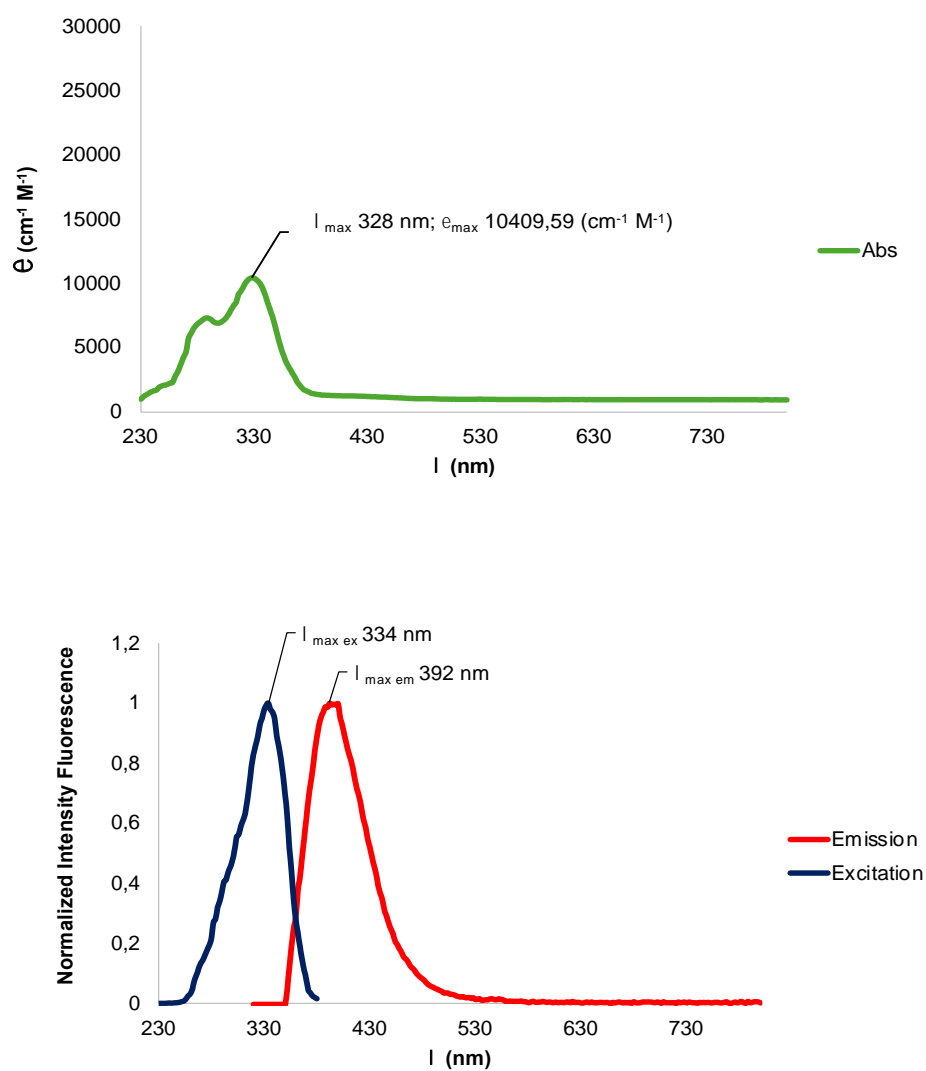

Figure S29. Absorbance and normalized fluorescence emission/excitation spectra of **7-MC** 0.1 mM + DTT 10 mM in DMF



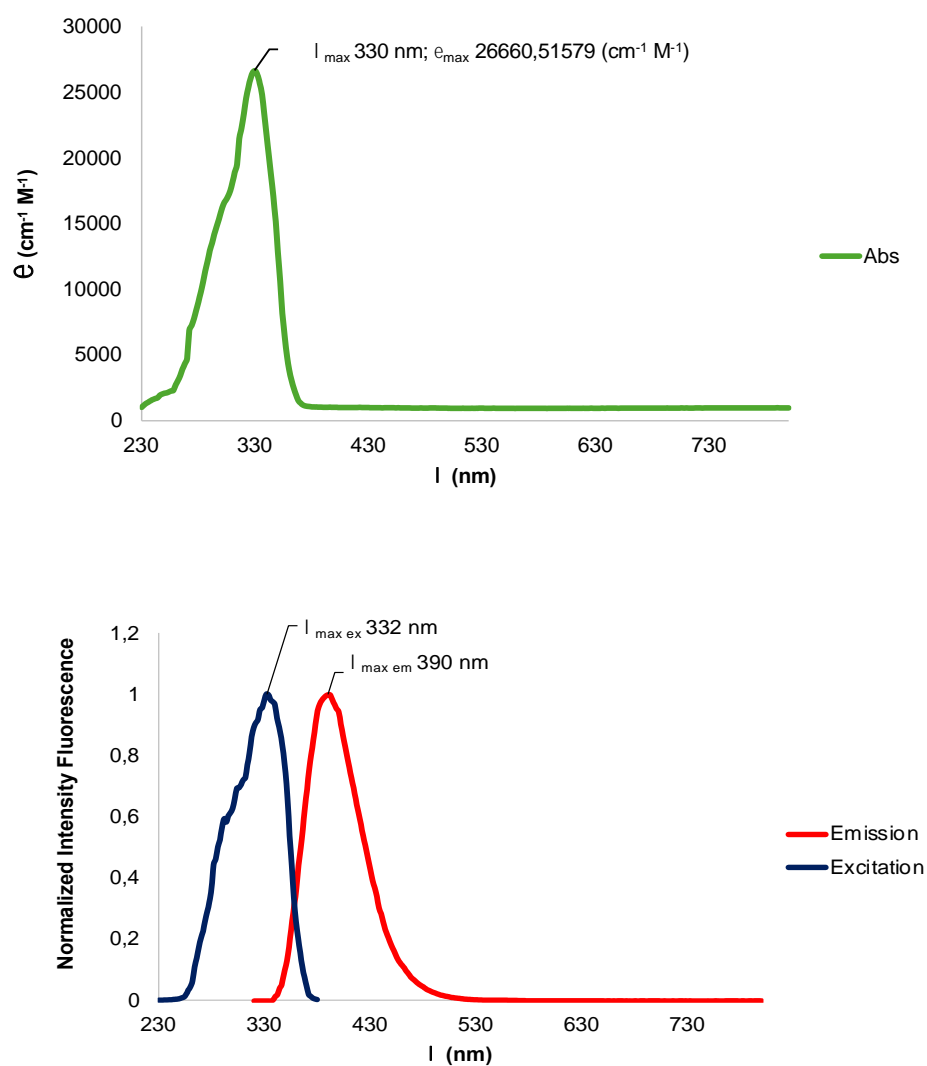

Figure S30. Absorbance and normalized fluorescence emission/excitation spectra of **S-1** 0.1 mM in DMF

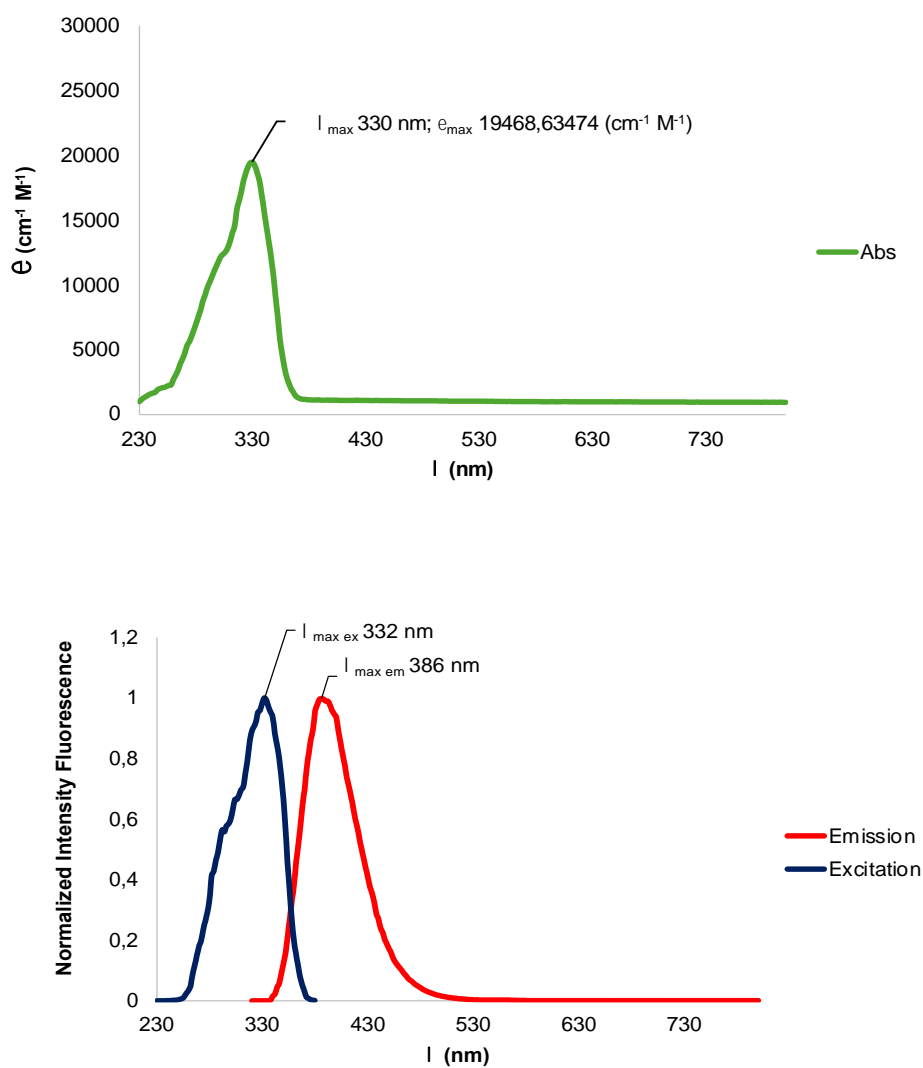

Figure S31. Absorbance and normalized fluorescence emission/excitation spectra of **S-2** 0.1mM in DMF

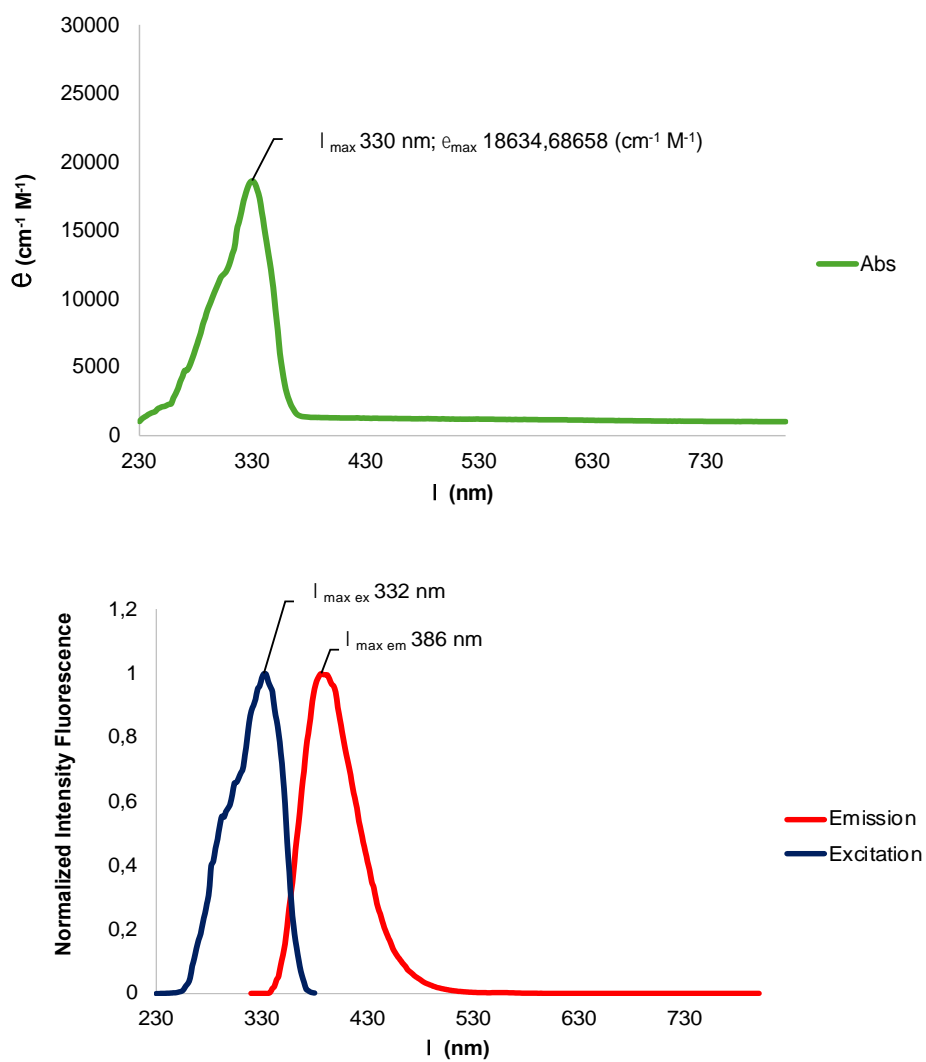

Figure S32. Absorbance and normalized fluorescence emission/excitation spectra of **S-3** 0.1 mM in DMF

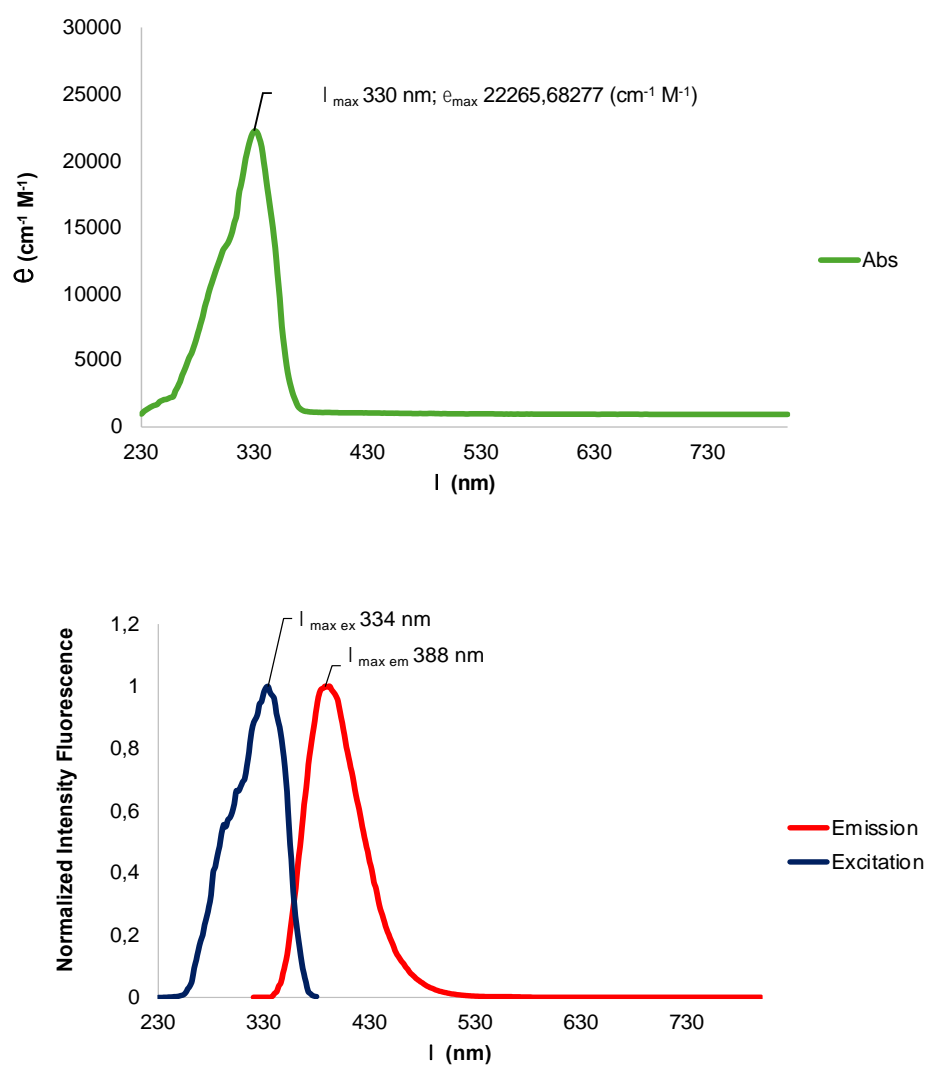

Figure S33. Absorbance and normalized fluorescence emission/excitation spectra of **S-4** 0.1 mM in DMF

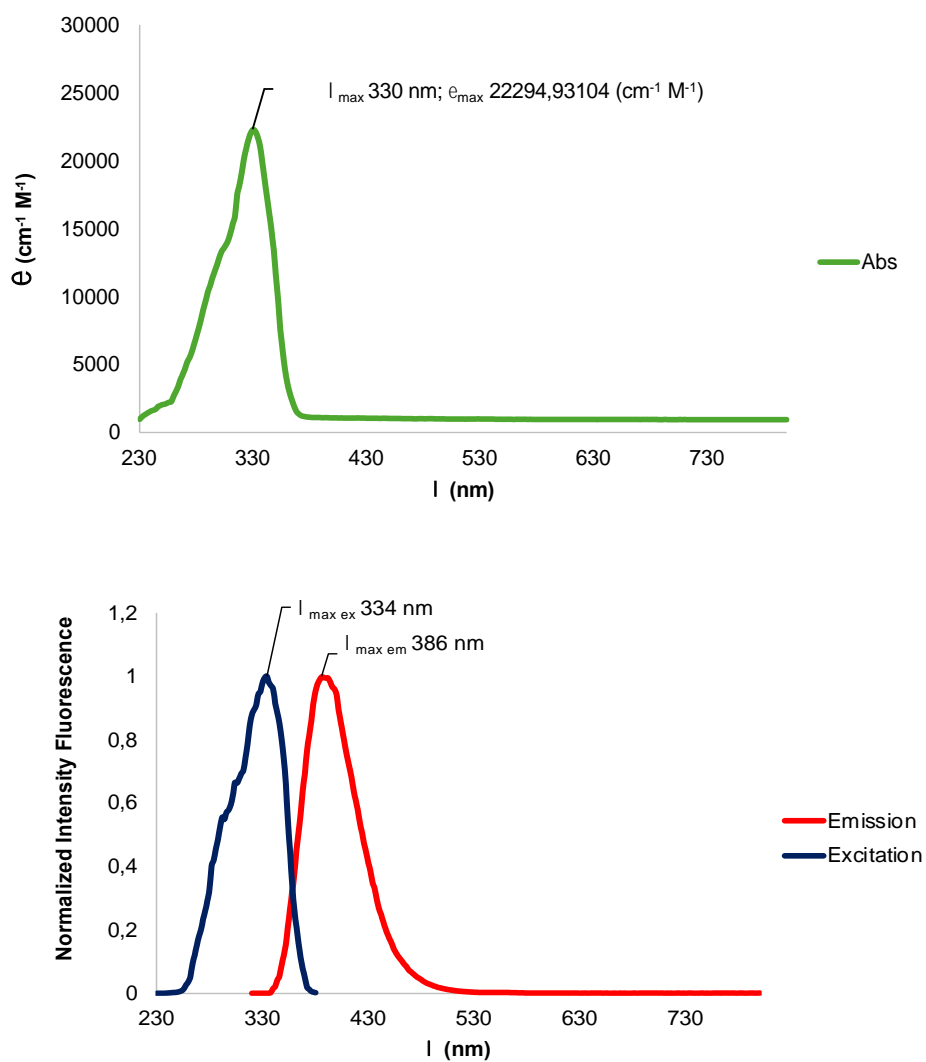

Figure S34. Absorbance and normalized fluorescence emission/excitation spectra of **S-5** 0.1 mM in DMF

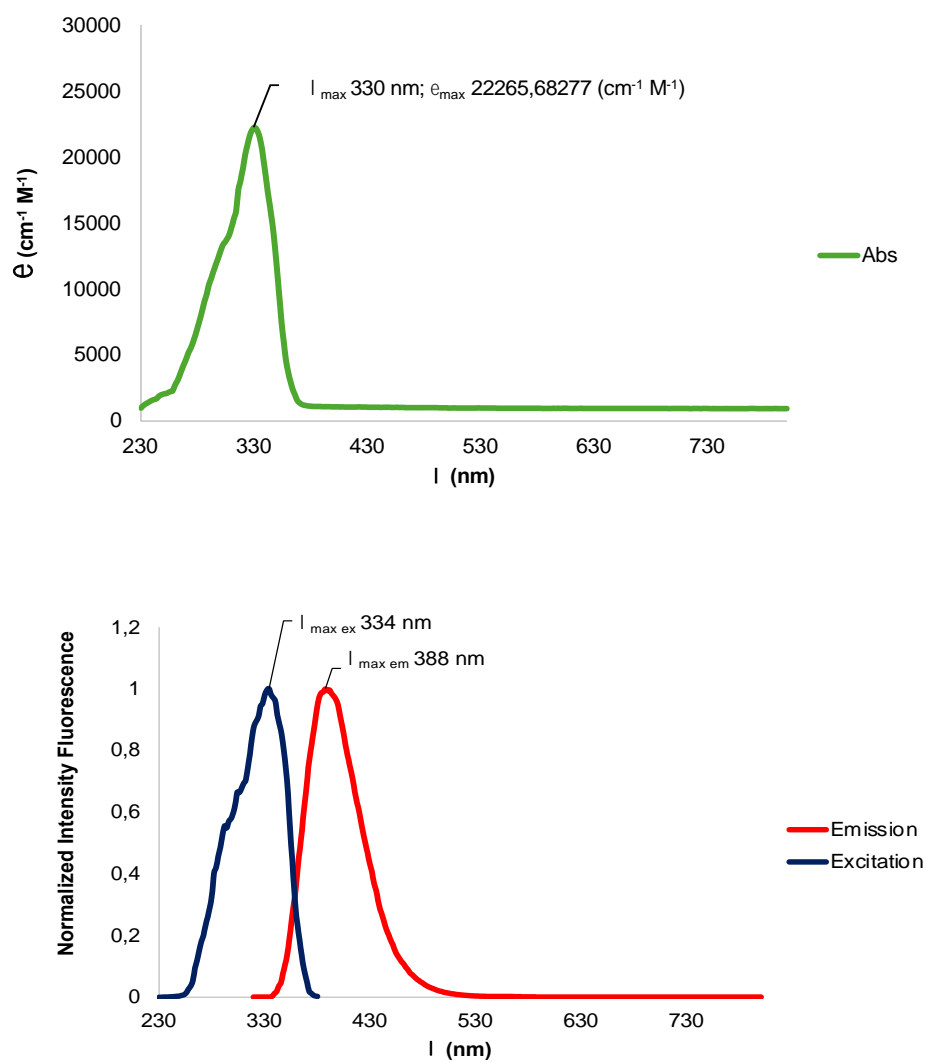

Figure S35. Absorbance and normalized fluorescence emission/excitation spectra of **S-6** 0.1 mM in DMF

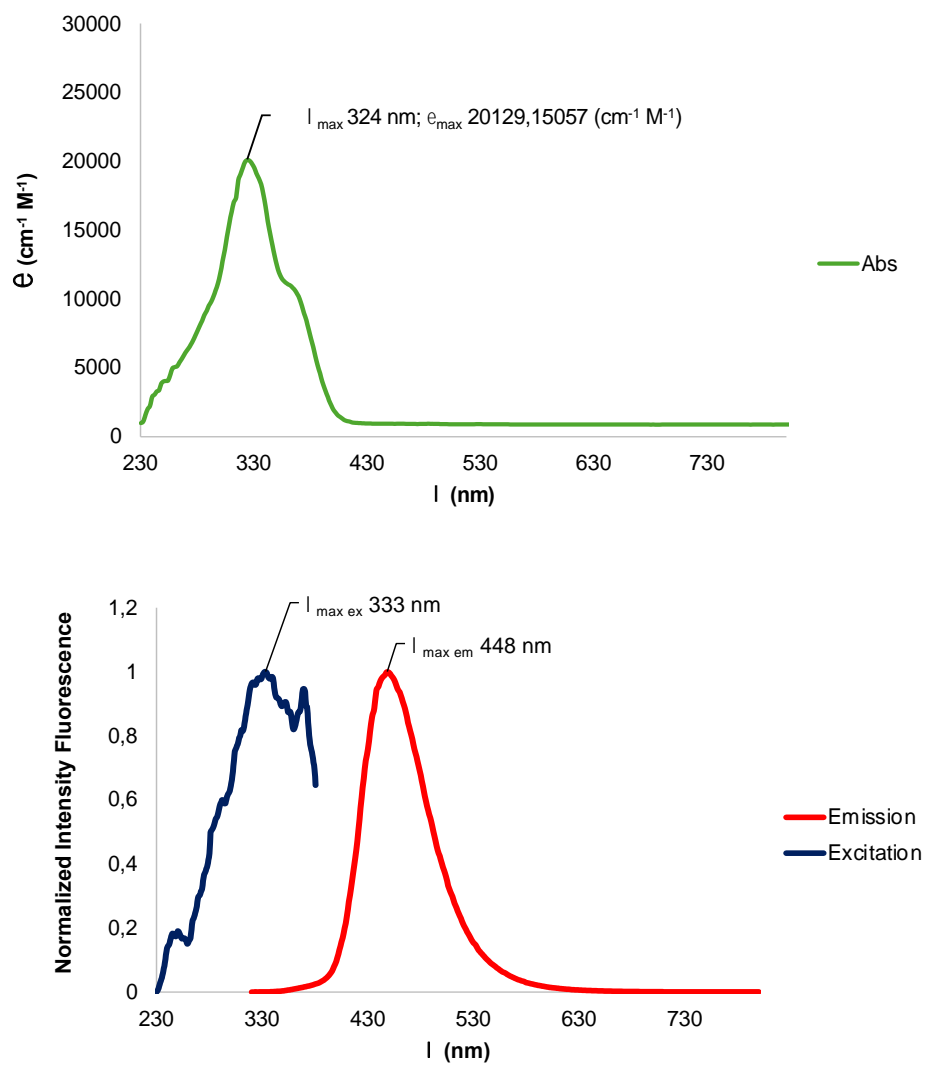

Figure S36. Absorbance and normalized fluorescence emission/excitation spectra of **4-MUB** 0.1 mM in PBS 1x (pH = 7.4)

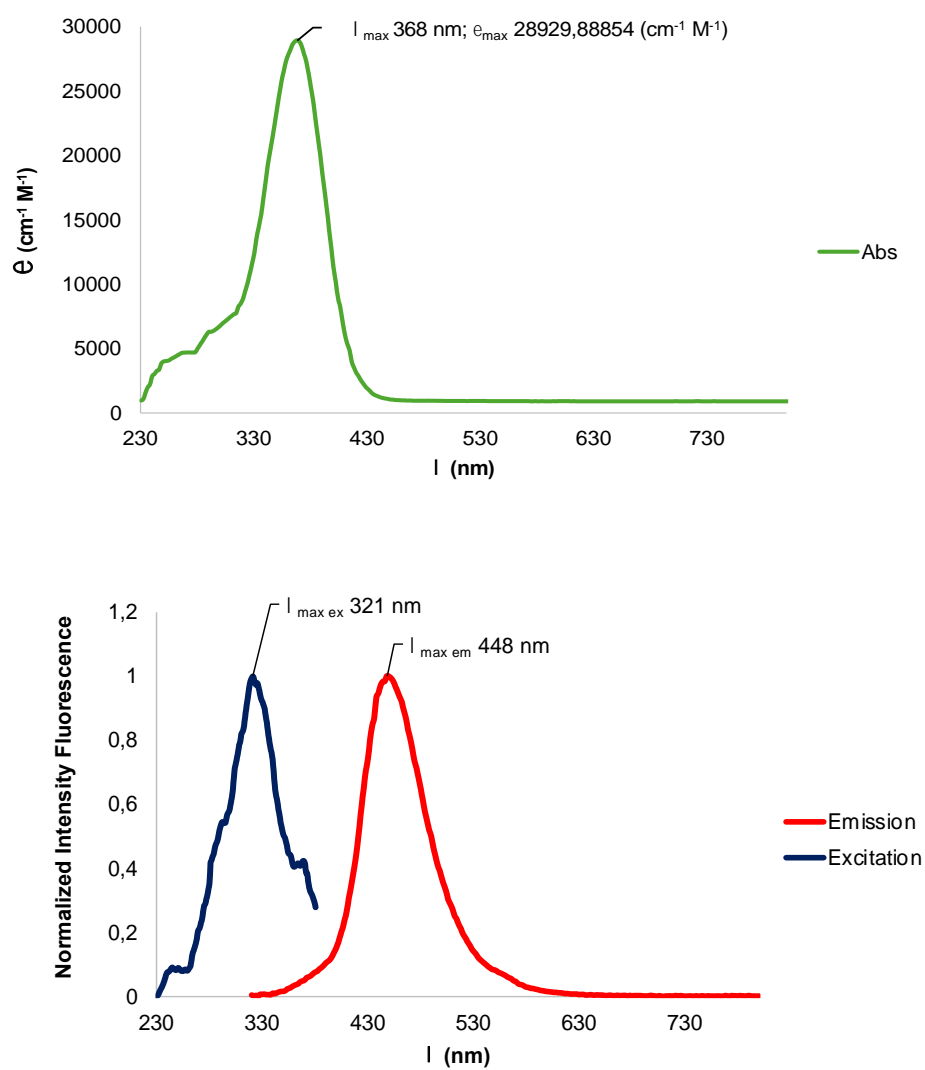

Figure S37. Absorbance and normalized fluorescence emission/excitation spectra of **7-MC** 0.1 mM + **DTT** 10 mM in PBS 1x (pH = 7.4)



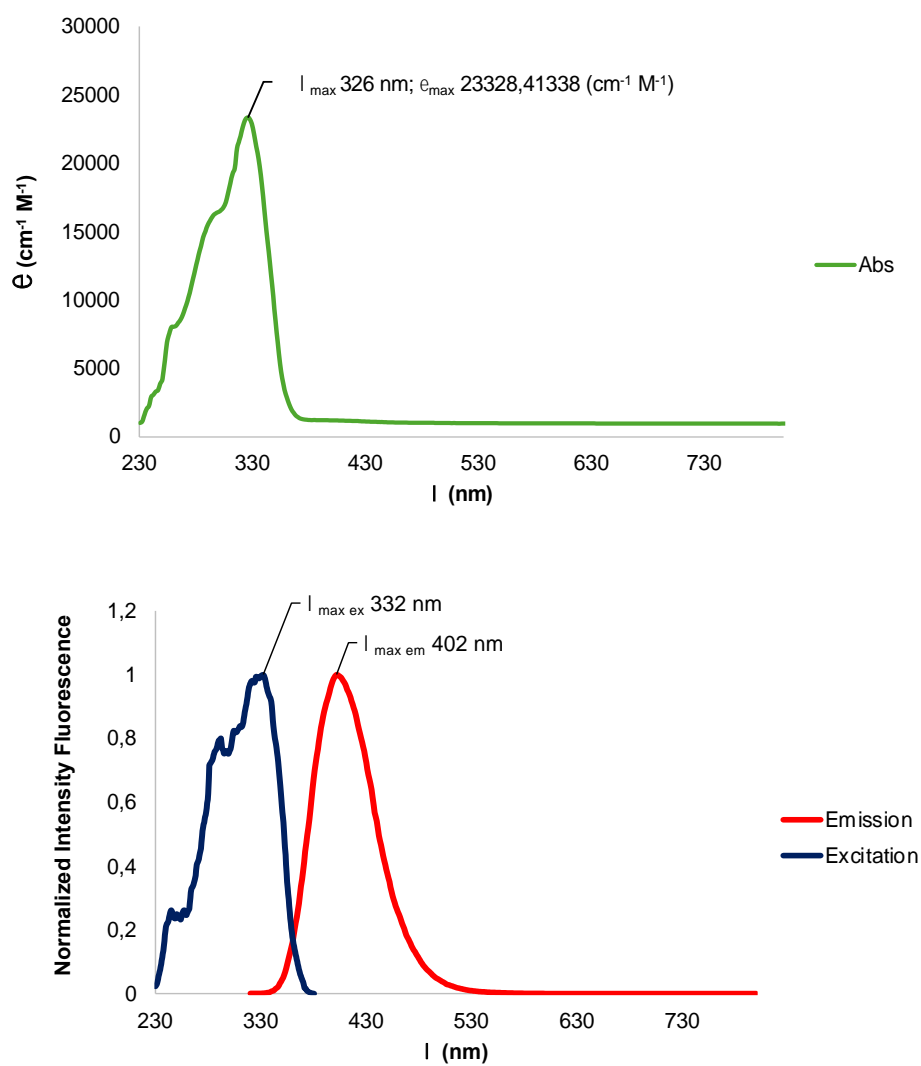

Figure S38. Absorbance and normalized fluorescence emission/excitation spectra of **S-1** 0.1 mM in PBS 1x (pH = 7.4)

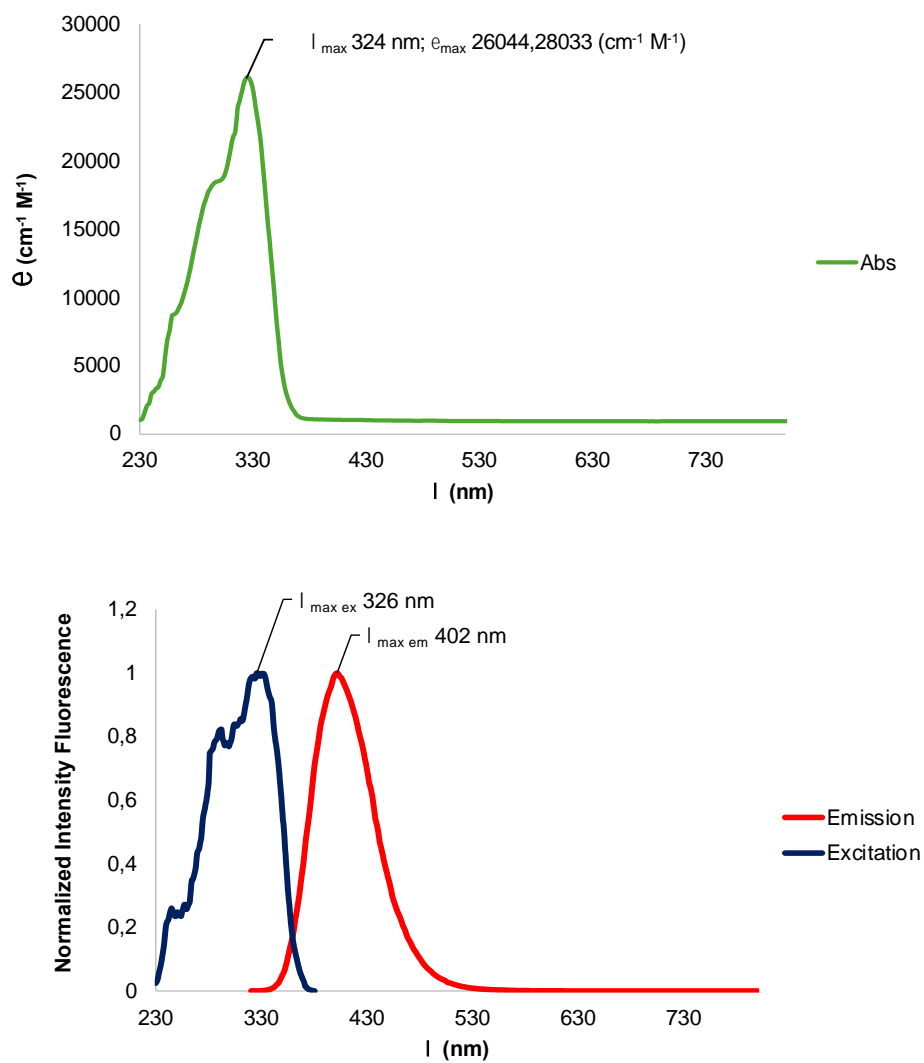

Figure S39. Absorbance and normalized fluorescence emission/excitation spectra of **S-2** 0.1 mM in PBS 1x (pH = 7.4)

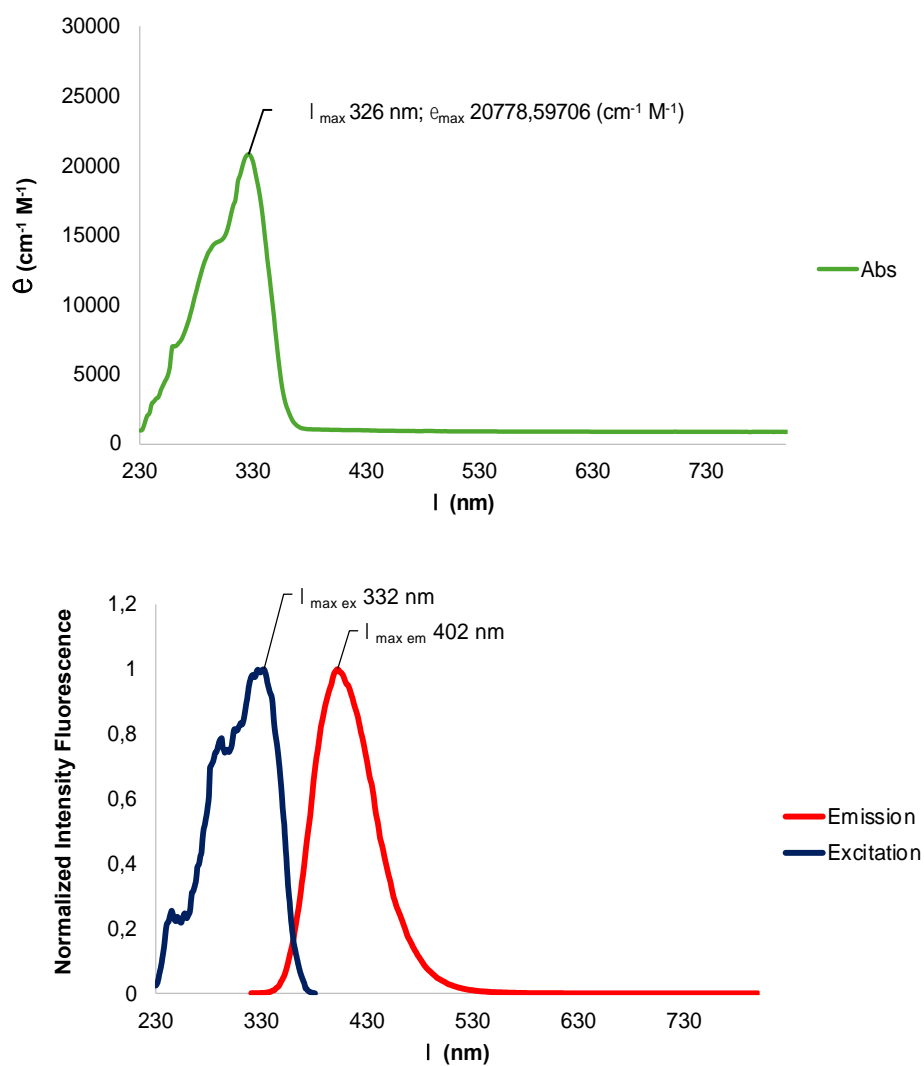

Figure S40. Absorbance and normalized fluorescence emission/excitation spectra of **S-3** 0.1 mM in PBS 1x (pH = 7.4)

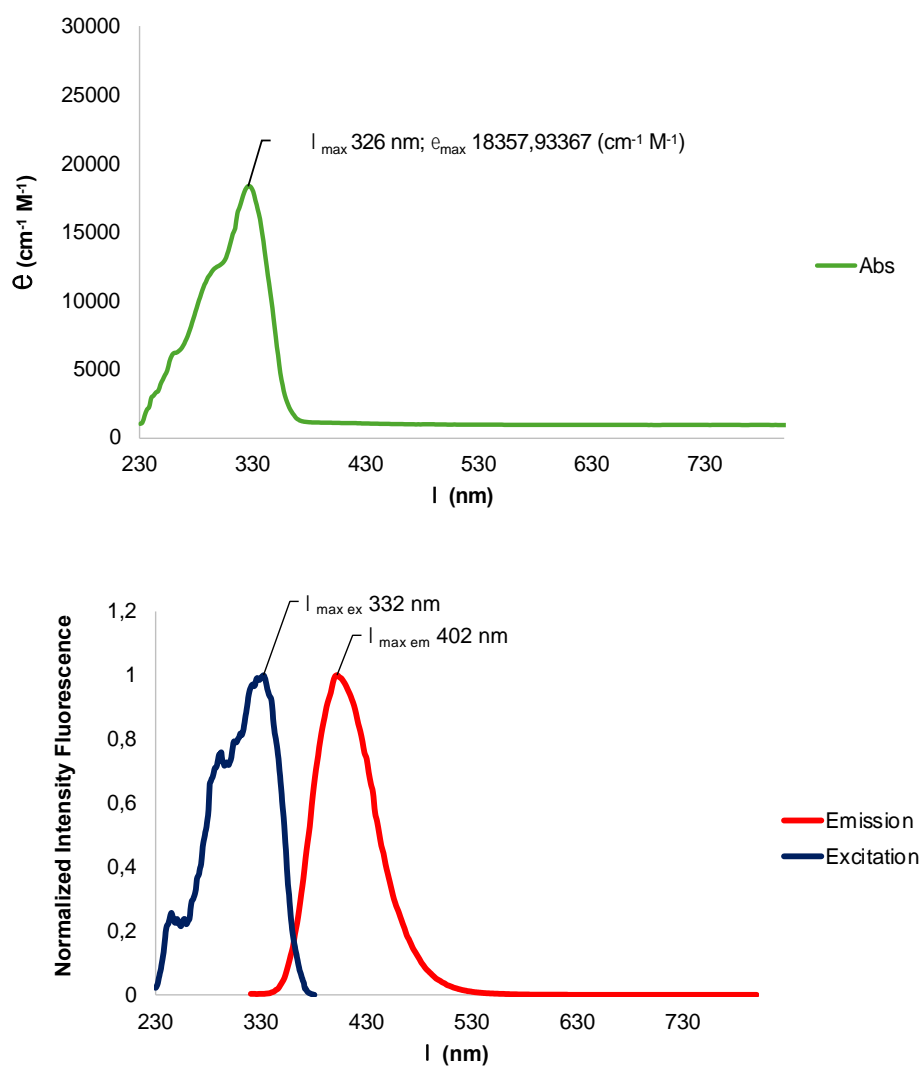

Figure S41. Absorbance and normalized fluorescence emission/excitation spectra of **S-4** 0.1 mM in PBS 1x (pH = 7.4)

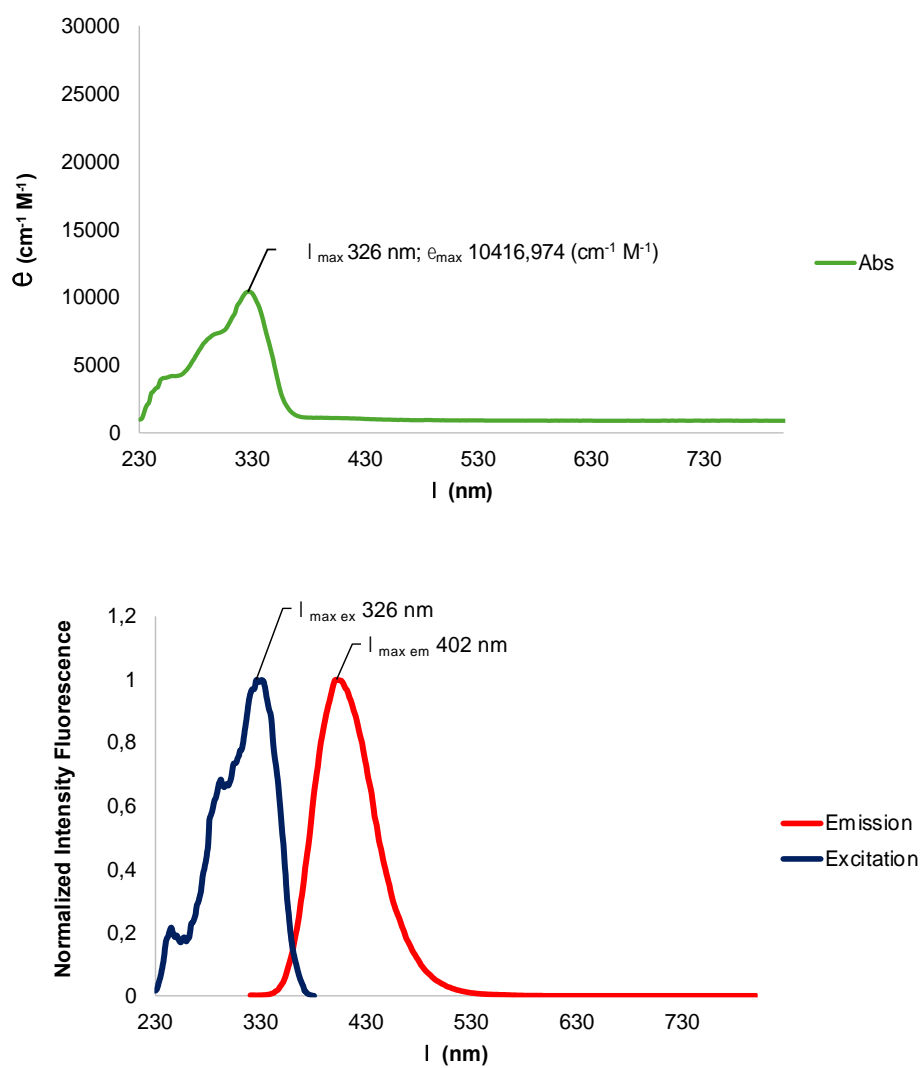

Figure S42. Absorbance and normalized fluorescence emission/excitation spectra of **S-5** 0.1 mM in PBS 1x (pH = 7.4)

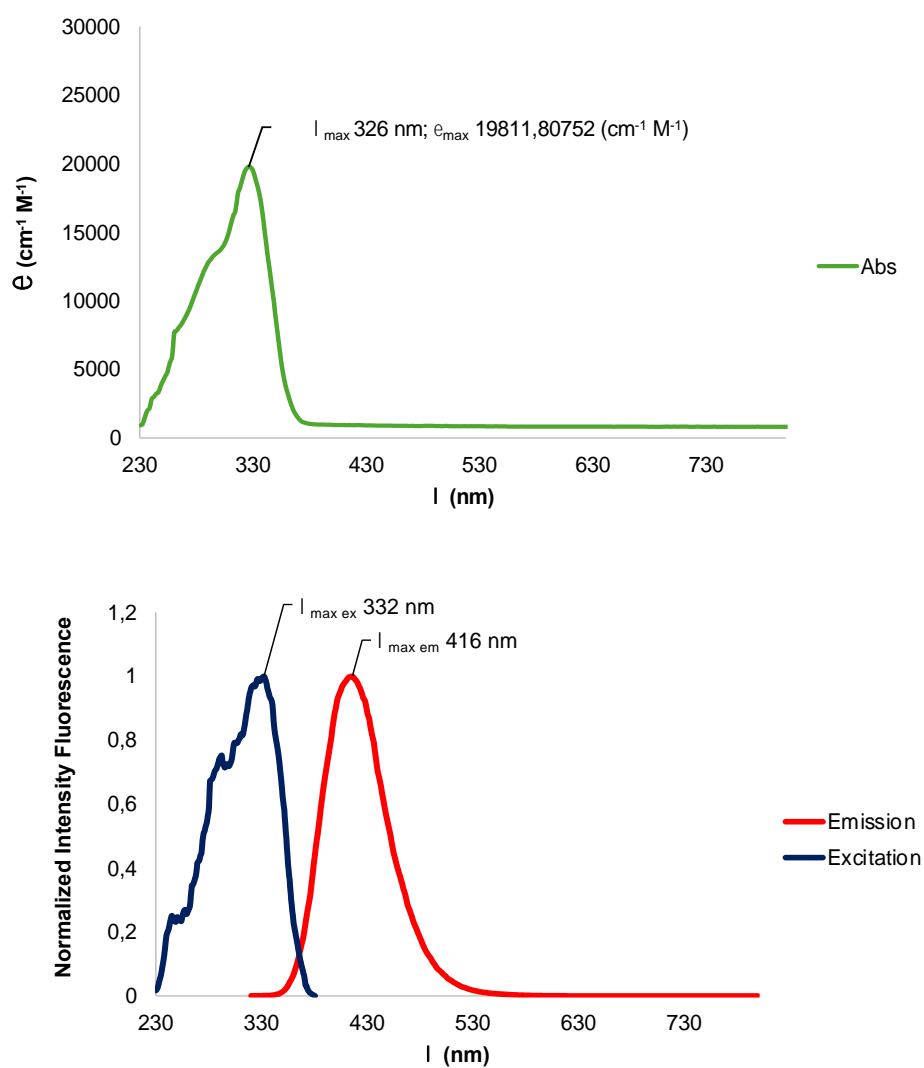

Figure S43. Absorbance and normalized fluorescence emission/excitation spectra of **S-6** 0.1 mM in PBS 1x (pH = 7.4)

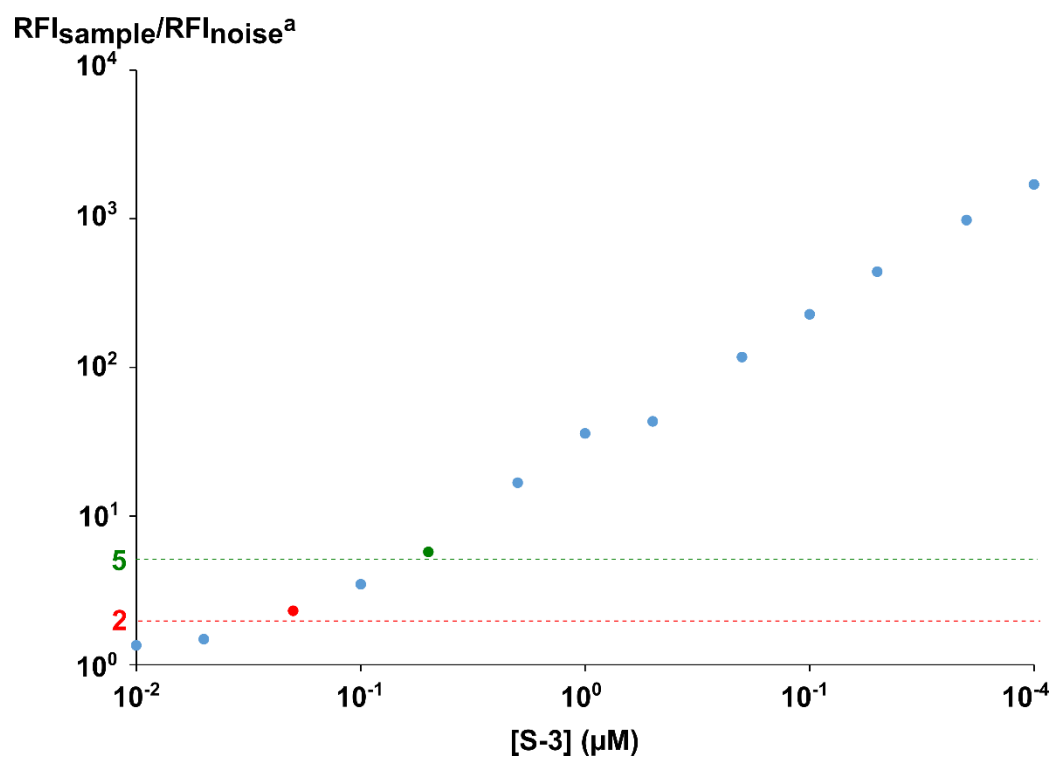

Figure S44. LOD & LOQ determination of **S-3** in PBS buffer. <sup>a</sup>RFI:Relative Fluorescence Intensity. The green (resp. red) dashed line correspond to the LOQ (resp. LOD). The minimum concentrations that gave signal/noise ratio above LOQ (resp. LOD) are indicated in the corresponding color, as were found to be  $0.2 \mu\text{M}$  (resp  $0.05 \mu\text{M}$ ).
